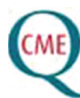

# 2016 European Guidelines on cardiovascular disease prevention in clinical practice – Web Addenda

**The Sixth Joint Task Force of the European Society of Cardiology and Other Societies on Cardiovascular Disease Prevention in Clinical Practice (constituted by representatives of 10 societies and by invited experts)**

**Developed with the special contribution of the European Association for Cardiovascular Prevention & Rehabilitation (EACPR)**

**Authors/Task Force Members: Massimo F. Piepoli\* (Chairperson) (Italy), Arno W. Hoes\* (Co-Chairperson) (The Netherlands), Stefan Agewall (Norway)<sup>1</sup>, Christian Albus (Germany)<sup>9</sup>, Carlos Brotons (Spain)<sup>10</sup>, Alberico L. Catapano (Italy)<sup>3</sup>, Marie-Therese Cooney (Ireland)<sup>1</sup>, Ugo Corrà (Italy)<sup>1</sup>, Bernard Cosyns (Belgium)<sup>1</sup>, Christi Deaton (UK)<sup>1</sup>, Ian Graham (Ireland)<sup>1</sup>, Michael Stephen Hall (UK)<sup>7</sup>, F. D. Richard Hobbs (UK)<sup>10</sup>, Maja-Lisa Løchen (Norway)<sup>1</sup>, Herbert Løllgen (Germany)<sup>8</sup>, Pedro Marques-Vidal (Switzerland)<sup>1</sup>, Joep Perk (Sweden)<sup>1</sup>, Eva Prescott (Denmark)<sup>1</sup>, Josep Redon (Spain)<sup>5</sup>, Dimitrios J. Richter (Greece)<sup>1</sup>, Naveed Sattar (UK)<sup>2</sup>, Yvo Smulders (The Netherlands)<sup>1</sup>, Monica Tiberi (Italy)<sup>1</sup>, H. Bart van der Worp (The Netherlands)<sup>6</sup>, Ineke van Dis (The Netherlands)<sup>4</sup>, W. M. Monique Verschuren (The Netherlands)<sup>1</sup>**

**Additional Contributor: Simone Binno (Italy)**

\* Corresponding authors: Massimo F. Piepoli, Heart Failure Unit, Cardiology Department, Polichirurgico Hospital G. Da Saliceto, Cantone Del Cristo, 29121 Piacenza, Emilia Romagna, Italy, Tel: +39 0523 30 32 17, Fax: +39 0523 30 32 20, E-mail: [m.piepoli@alice.it](mailto:m.piepoli@alice.it), [m.piepoli@imperial.ac.uk](mailto:m.piepoli@imperial.ac.uk).

Arno W. Hoes, Julius Center for Health Sciences and Primary Care, University Medical Center Utrecht, PO Box 85500 (HP Str. 6.131), 3508 GA Utrecht, The Netherlands, Tel: +31 88 756 8193, Fax: +31 88 756 8099, E-mail: [a.w.hoes@umcutrecht.nl](mailto:a.w.hoes@umcutrecht.nl).

**ESC Committee for Practice Guidelines (CPG) and National Cardiac Societies document reviewers: listed in the Appendix.**

**ESC entities having participated in the development of this document:**

**Associations:** European Association for Cardiovascular Prevention & Rehabilitation (EACPR), European Association of Cardiovascular Imaging (EACVI), European Association of Percutaneous Cardiovascular Interventions (EAPCI), Heart Failure Association (HFA).

**Councils:** Council on Cardiovascular Nursing and Allied Professions, Council for Cardiology Practice, Council on Cardiovascular Primary Care.

**Working Groups:** Cardiovascular Pharmacotherapy

The content of these European Society of Cardiology (ESC) Guidelines has been published for personal and educational use only. No commercial use is authorized. No part of the ESC Guidelines may be translated or reproduced in any form without written permission from the ESC. Permission can be obtained upon submission of a written request to Oxford University Press, the publisher of the European Heart Journal and the party authorized to handle such permissions on behalf of the ESC.

**Disclaimer:** The ESC Guidelines represent the views of the ESC and were produced after careful consideration of the scientific and medical knowledge and the evidence available at the time of their publication. The ESC is not responsible in the event of any contradiction, discrepancy and/or ambiguity between the ESC Guidelines and any other official recommendations or guidelines issued by the relevant public health authorities, in particular in relation to good use of healthcare or therapeutic strategies. Health professionals are encouraged to take the ESC Guidelines fully into account when exercising their clinical judgment, as well as in the determination and the implementation of preventive, diagnostic or therapeutic medical strategies; however, the ESC Guidelines do not override, in any way whatsoever, the individual responsibility of health professionals to make appropriate and accurate decisions in consideration of each patient's health condition and in consultation with that patient and, where appropriate and/or necessary, the patient's caregiver. Nor do the ESC Guidelines exempt health professionals from taking into full and careful consideration the relevant official updated recommendations or guidelines issued by the competent public health authorities, in order to manage each patient's case in light of the scientifically accepted data pursuant to their respective ethical and professional obligations. It is also the health professional's responsibility to verify the applicable rules and regulations relating to drugs and medical devices at the time of prescription.

© The European Society of Cardiology 2016. All rights reserved. For permissions please email: [journals.permissions@oup.com](mailto:journals.permissions@oup.com).

**Document Reviewers:** Guy De Backer (CPG Review Coordinator) (Belgium), Marco Roffi (CPG Review Coordinator) (Switzerland), Victor Aboyans (France)<sup>1</sup>, Norbert Bachl (Austria)<sup>8</sup>, Héctor Bueno (Spain)<sup>1</sup>, Scipione Carerj (Italy)<sup>1</sup>, Leslie Cho (USA)<sup>1</sup>, John Cox (Ireland)<sup>10</sup>, Johan De Sutter (Belgium)<sup>1</sup>, Günther Egidi (Germany)<sup>1</sup>, Miles Fisher (UK)<sup>2</sup>, Donna Fitzsimons (UK)<sup>1</sup>, Oscar H. Franco (The Netherlands)<sup>1</sup>, Maxime Guenoun (France)<sup>1</sup>, Catriona Jennings (UK)<sup>1</sup>, Borut Jug (Slovenia)<sup>4</sup>, Paulus Kirchhof (UK/Germany)<sup>1</sup>, Kornelia Kotseva (UK)<sup>1</sup>, Gregory Y.H. Lip (UK)<sup>1</sup>, François Mach (Switzerland)<sup>1</sup>, Giuseppe Mancina (Italy)<sup>5</sup>, Franz Martin Bermudo (Spain)<sup>7</sup>, Alessandro Mezzani (Italy)<sup>1</sup>, Alexander Niessner (Austria)<sup>1</sup>, Piotr Ponikowski (Poland)<sup>1</sup>, Bernhard Rauch (Germany)<sup>1</sup>, Lars Rydén (Sweden)<sup>1</sup>, Adrienne Stauder (Hungary)<sup>9</sup>, Guillaume Turc (France)<sup>6</sup>, Olov Wiklund (Sweden)<sup>3</sup>, Stephan Windecker (Switzerland)<sup>1</sup>, Jose Luis Zamorano (Spain)<sup>1</sup>

**Societies:** <sup>1</sup>European Society of Cardiology (ESC); <sup>2</sup>European Association for the Study of Diabetes (EASD); <sup>3</sup>European Atherosclerosis Society (EAS); <sup>4</sup>European Heart Network (EHN); <sup>5</sup>European Society of Hypertension (ESH); <sup>6</sup>European Stroke Organisation (ESO); <sup>7</sup>International Diabetes Federation European Region (IDF Europe); <sup>8</sup>International Federation of Sport Medicine (FIMS); <sup>9</sup>International Society of Behavioural Medicine (ISBM); <sup>10</sup>WONCA Europe.

The disclosure forms of all experts involved in the development of these guidelines are available on the ESC website <http://www.escardio.org/guidelines>

**Keywords**

Guidelines • Blood pressure • Clinical settings • Diabetes • Healthy lifestyle • Lipid • Nutrition • Physical activity • Population • Prevention • Primary care • Psychosocial factors • Rehabilitation • Risk assessment • Risk management • Smoking • Stakeholder

Web Contents

3b.. How to intervene at the individual level: disease-specific intervention—atrial fibrillation, coronary artery disease, chronic heart failure, cerebrovascular disease, peripheral artery disease . . . 2

3b.1. Atrial fibrillation . . . . . 2

3b.1.1. Prevention of cardiovascular complications in atrial fibrillation . . . . . 2

3b.1.2. Prevention of cardiovascular disease risk factors in atrial fibrillation patients . . . . . 3

3b.1.3. Lone atrial fibrillation . . . . . 3

3b.2. Coronary artery disease . . . . . 3

3b.3. Chronic heart failure . . . . . 4

3b.4. Cerebrovascular disease . . . . . 6

3b.5. Peripheral artery disease . . . . . 7

4. Web Figures . . . . . 8

5. Web Tables . . . . . 19

6. Web References . . . . . 23

3b. How to intervene at the individual level: disease-specific intervention—atrial fibrillation, coronary artery disease, chronic heart failure, cerebrovascular disease, peripheral artery disease

3b.1 Atrial fibrillation

Key message

- Hypertension in atrial fibrillation (AF) patients doubles the risk of CV complications and must be treated in all grades.

**Recommendations for atrial fibrillation**

| Recommendations                                                                                                                                                                           | Class <sup>a</sup> | Level <sup>b</sup> | Ref <sup>c</sup> |
|-------------------------------------------------------------------------------------------------------------------------------------------------------------------------------------------|--------------------|--------------------|------------------|
| It is recommended to assess stroke risk by CHA <sub>2</sub> DS <sub>2</sub> -VASc score or CHADS <sub>2</sub> score, bleeding risk by HAS-BLED score and consider antithrombotic therapy. | I                  | A                  | 1, 2             |
| In patients ≥65 years or with diabetes screening by pulse palpation, followed by ECG if irregular pulse, to detect atrial fibrillation is recommended.                                    | I                  | B                  | 1, 2             |

ECG = electrocardiogram.

<sup>a</sup>Class of recommendation.

<sup>b</sup>Level of evidence.

<sup>c</sup>Reference(s) supporting recommendations.

3b.1.1 Prevention of cardiovascular complications in atrial fibrillation

AF is the most common arrhythmia, with an estimated lifetime risk of 25%. AF is associated with increased risk of death, stroke, heart failure (HF), thromboembolism, cognitive dysfunction, hospitalization and reduced quality of life.<sup>3</sup> AF is associated with about a two-fold increased risk of AMI. Twenty per cent of strokes are caused by AF and the stroke risk is ~60% higher in women than in men. AF can be readily detected. It is recommended that in patients ≥65 years of age or with diabetes, opportunistic screening by pulse palpation for at least 30 sec should be performed, followed by an electrocardiogram (ECG) in those with an irregular pulse.<sup>1,2</sup>

Management of AF patients is aimed at preventing severe cardiovascular disease (CVD) complications associated with AF and relies on antithrombotic therapy with vitamin K antagonist therapy or non-vitamin K

antagonist oral anticoagulants. Recommendations for antithrombotic therapy should be based on risk factors for stroke and thromboembolism in addition to risk of bleeding. Stroke risk assessment with the CHA<sub>2</sub>-DS<sub>2</sub>-VASc score or CHADS<sub>2</sub> score include the most common stroke risk factors. A bleeding risk assessment with the HAS-BLED is recommended for all AF patients. Residual high risk of death in anticoagulated AF patients remains a CVD prevention issue. Regarding rate and rhythm control in AF patients, we refer to the Guidelines for the Management of Atrial Fibrillation.<sup>1,2</sup>

### 3b.1.2 Prevention of cardiovascular disease risk factors in atrial fibrillation patients

Many classic CVD risk factors are also risk factors for AF, particularly age, smoking, sedentary habits, obesity, hypertension and diabetes.<sup>4</sup> Hypertension and AF often coexist and lead to doubling of all CVD complications and mortality in AF patients. Other clinical conditions associated with AF occurrence are hyperthyroidism, obstructive sleep apnoea, chronic kidney disease, inflammation, uric acid, major surgery, alcohol and coffee consumption and high-endurance physical activity.<sup>3</sup> Blood pressure (BP) measurement in AF patients should be performed with a standard auscultatory BP monitor, because automated BP monitors are inaccurate in measuring BP in AF patients. Antihypertensive treatment may contribute to reduce the risk in these high-risk patients, in addition to antithrombotic therapy. The main goal is BP reduction per se, and there are insufficient data to recommend specific drugs.<sup>5</sup> However, angiotensin-converting enzyme inhibitors (ACE-Is) and angiotensin receptor blockers (ARBs) should be considered the first choice in AF patients,<sup>1</sup> followed by  $\beta$ -blockers and mineralocorticoid antagonists. Obesity and diabetes in AF patients increase CVD risk by creating a prothrombotic state.

Diabetes is included in the score for stroke risk assessment, while obesity is not. It is not known which obesity intervention is most cost effective in AF patients. Lifestyle risk interventions in AF patients have largely targeted physical activity, which should probably be encouraged, but studies have not shown the effect of physical activity on CVD in AF patients.<sup>6</sup> The presence of ischaemic heart disease and smoking increases the CVD risk despite antithrombotic therapy. Smoking cessation is therefore crucial. Less evidence is available on the effects of statins on major CVD outcomes in AF patients. These patients should be treated according to the SCORE recommendations and not merely because they have AF.

### 3b.1.3 Lone atrial fibrillation

In AF subjects <65 years of age, without heart disease or hypertension (lone AF) and without risk factors requiring antithrombotic therapy, AF is not associated with increased risk of stroke or death and antithrombotic therapy is not recommended. Lone AF is a diagnosis of exclusion. The risk of stroke in young patients with lone AF increases with advancing age or development of hypertension, underlining the importance of regular reassessment of risk factors over time.<sup>1,2</sup>

## 3b.2 Coronary artery disease

### Key message

- Prevention is crucial for short- and long-term outcomes in coronary artery disease (CAD), and it should be started as soon as possible, with a multidimensional approach that combines feasibility and efficacy. An appropriate discharge plan should be considered.

Acute manifestations of CAD, associated complications and successive management and surveillance should be administered

### Recommendations for coronary artery disease

|                    | Recommendations                                                                                                                                                                                                                                       | Class <sup>a</sup> | Level <sup>b</sup> | Ref <sup>c</sup> |
|--------------------|-------------------------------------------------------------------------------------------------------------------------------------------------------------------------------------------------------------------------------------------------------|--------------------|--------------------|------------------|
| Patient assessment | Clinical history taking, including the conventional risk factors for the development of CAD (such as for example glycaemic state) with revision of the clinical course (uncomplicated or complicated) of ACS is recommended.                          | I                  | A                  | 7-9              |
|                    | Physical examination is recommended.                                                                                                                                                                                                                  | I                  | C                  | 9                |
|                    | The ECG is predictive of early risk: It is recommended to obtain a 12-lead ECG and to have it interpreted by an experienced physician. It is recommended to obtain an additional 12-lead ECG in case of recurrent symptoms or diagnostic uncertainty. | I                  | B                  | 9-11             |
|                    | Additional ECG leads (V3R, V4R, V7-V9) are recommended if on-going ischaemia is suspected when standard leads are inconclusive.                                                                                                                       | I                  | C                  |                  |
|                    | A resting transthoracic echocardiogram is recommended in all patients for: a) exclusion of alternative causes of angina; b) regional wall motion abnormalities suggestive of CAD; c) measurement of LVEF for d) evaluation of diastolic function.     | I                  | B                  | 9-11             |
|                    | Chest X-ray should be considered in patients with suspected HF.                                                                                                                                                                                       | IIa                | C                  |                  |
|                    | Arrhythmic burden assessment (ventricular arrhythmias, AF and other supraventricular tachy-arrhythmias, and bradycardia, AV block, and intra-ventricular conduction defects) is recommended.                                                          | I                  | A                  | 7-9, 12, 13      |
|                    | Ambulatory monitoring should be considered in patients in whom arrhythmias are suspected.                                                                                                                                                             | IIa                | C                  |                  |
|                    | Exercise stress testing should be considered to evaluate the efficacy of medical treatment or after revascularization, or to assist prescription of exercise after control of symptoms.                                                               | IIa                | B                  | 9, 14            |
|                    | Exercise capacity and ischaemic threshold assessment should be considered by exercise maximal stress test (ergospirometry if available) to plan the exercise training programme.                                                                      | IIa                | B                  | 9, 14            |
|                    | An imaging stress test is recommended in patients with resting ECG abnormalities which prevent accurate interpretation of ECG changes during stress.                                                                                                  | I                  | B                  | 13               |
|                    | An imaging stress test should be considered to assess the functional severity of intermediate lesions on coronary arteriography.                                                                                                                      | IIa                | B                  | 13               |

continued

## Recommendations for coronary artery disease (continued)

|                                      |                                                                                                                                                                                                                                                                                                                                                                                                                                                                                                                        |            |          |              |
|--------------------------------------|------------------------------------------------------------------------------------------------------------------------------------------------------------------------------------------------------------------------------------------------------------------------------------------------------------------------------------------------------------------------------------------------------------------------------------------------------------------------------------------------------------------------|------------|----------|--------------|
| <b>Physical activity counselling</b> | In the presence of exercise capacity >5 METs without symptoms, return to routine physical activity is recommended; otherwise, the patient should resume physical activity at 50% of maximal exercise capacity and gradually increase. Physical activity should be a combination of activities like walking, climbing stairs, cycling and supervised medically prescribed aerobic exercise training.                                                                                                                    | <b>I</b>   | <b>B</b> | 9, 15, 16    |
| <b>Exercise training</b>             | In low risk patients, at least 2 hours/week aerobic exercise at 55–70% of the maximum work load (METs) or heart rate at the onset of symptoms ( $\geq 1500$ kcal/week) are recommended. In moderate to high-risk patients, an individualised programme is recommended, that starts with <50% maximum workload (METs), resistance exercise at least 1 hour/week, 10–15 repetitions per set to moderate fatigue. (refer also to section 3a.3).                                                                           | <b>I</b>   | <b>B</b> | 9, 17–19     |
| <b>Diet/nutritional counselling</b>  | Caloric intake is recommended to be balanced by energy expenditure (physical activity) to achieve and maintain healthy BMI. Diet poor in cholesterol and saturated fat is recommended. (refer also to section 3a.5).                                                                                                                                                                                                                                                                                                   | <b>I</b>   | <b>C</b> | 9, 15, 20    |
| <b>Weight control management</b>     | Normal-weight CAD patients should be advised to avoid weight gain. On each patient visit, it is recommended to consistently encourage weight control through an appropriate balance of physical activity, caloric intake, and formal behavioural programmes when indicated to achieve and maintain a healthy BMI. If waist circumference is $\geq 80$ cm in women or $\geq 94$ cm in men, it is recommended to initiate lifestyle changes and consider treatment strategies as indicated (refer also to section 3a.6). | <b>I</b>   | <b>B</b> | 9, 15, 20–23 |
| <b>Lipid management</b>              | According to lipid profile, statin therapy is recommended. (refer also to section 3a.7).                                                                                                                                                                                                                                                                                                                                                                                                                               | <b>I</b>   | <b>B</b> | 9, 20, 21    |
|                                      | Annual control of lipids, glucose metabolism and creatinine are recommended.                                                                                                                                                                                                                                                                                                                                                                                                                                           | <b>I</b>   | <b>C</b> |              |
| <b>BP monitoring</b>                 | A structured approach is recommended. (refer to section 3a.9).                                                                                                                                                                                                                                                                                                                                                                                                                                                         | <b>I</b>   | <b>B</b> | 9, 20, 24    |
| <b>Smoking cessation</b>             | A structured approach is recommended. (refer to section 3a.4).                                                                                                                                                                                                                                                                                                                                                                                                                                                         | <b>I</b>   | <b>B</b> | 9, 20        |
| <b>Psychosocial management</b>       | Psychosocial risk factor screening should be considered. (refer to section 2.4.2).                                                                                                                                                                                                                                                                                                                                                                                                                                     | <b>IIa</b> | <b>B</b> | 9, 16, 20    |
|                                      | Multimodal behavioural interventions is recommended. (refer to section 3a.1 and 3a.2).                                                                                                                                                                                                                                                                                                                                                                                                                                 | <b>I</b>   | <b>A</b> | 9, 16, 20    |

ACS = acute coronary syndrome; BMI = body mass index; BP = blood pressure; CAD = coronary artery disease; ECG = electrocardiogram; LVEF = left ventricular ejection fraction; MET = metabolic equivalent; PCI = percutaneous coronary intervention.

<sup>a</sup>Class of recommendation.

<sup>b</sup>Level of evidence.

<sup>c</sup>Reference(s) supporting recommendations.

according to guidelines.<sup>7,8,10–14,25</sup> Beyond that, survivors need structured support to restore their quality of life and to maintain or improve functional capacity.<sup>20</sup> A comprehensive professional lifestyle intervention based on behavioural models of change, with different strategies from the more basic, family-based to the more structured and complex modalities, according to CV risk assessment and concomitant diseases is recommended.<sup>9,10,20</sup> Risk factor management in terms of effective risk factor control, physical activity advice, psychosocial support and appropriate prescription of and adherence to cardioprotective drugs are integral to helping patients regain as full a life as possible.<sup>15–17,21–24, 26,27</sup> In short, CAD patients are at high risk and preventive measures are key.

The prescription and adherence to behavioural recommendations in the immediate post-event care of CAD patients should have as high a priority as other preventive medications and invasive strategies, and justify an investment in establishing programmes that systematically enhance early lifestyle modification and prevention. In a large cohort of CAD patients from several countries enrolled in the Organization to Assess Strategies in Acute Ischemic Syndromes (OASIS) 5 randomized clinical trial,<sup>26</sup> adherence to behavioural advice (diet, physical activity and smoking cessation) after an acute manifestation of CAD was associated with a substantially lower risk of recurrence. Benefits were seen early (<6 months), and each behaviour modification was additive. Hence, clinical assessment, risk factor control and behavioural policies should start as

soon as possible in the acute setting. Unfortunately, large proportions of patients still do not achieve the lifestyle, risk factor and therapeutic targets<sup>28</sup> and attendance at preventive programmes is still low.<sup>29</sup> To properly connect the acute and post-acute phase and to favour continuity of care and prevention, discharge planning is fundamental, as it selects and arranges the best next care setting and health care services, promotes patient and family preventive and education issues and organizes follow-up. A dedicated discharge letter can contribute to implementation:<sup>30</sup> beyond primary and secondary diagnosis, procedures and clinical progress descriptions, preventive concepts and recommendations oriented towards general and individual risk factor control, lifestyle intervention, medicine reconciliation and follow-up arrangements should be clearly announced.

#### Gap in evidence

- Although in CAD patients, prevention strategies have been demonstrated in observational studies, the best comprehensive tactic, setting and timing are still to be defined.

### 3b.3 Chronic heart failure

#### Key message

- CVD prevention in HF patients should start as soon as possible, and requires a multifaceted integrated tactic.

## Recommendations for chronic heart failure

|                                | Recommendations                                                                                                                                                                                                                                                                                                                                                                                                                                                                                                                                                               | Class <sup>a</sup> | Level <sup>b</sup> | Ref <sup>c</sup> |
|--------------------------------|-------------------------------------------------------------------------------------------------------------------------------------------------------------------------------------------------------------------------------------------------------------------------------------------------------------------------------------------------------------------------------------------------------------------------------------------------------------------------------------------------------------------------------------------------------------------------------|--------------------|--------------------|------------------|
|                                | The control of fluid status throughout the assessment of symptoms and signs is recommended.                                                                                                                                                                                                                                                                                                                                                                                                                                                                                   | I                  | B                  | 11, 31           |
| <b>Patient assessment</b>      | Identification of precipitating CV and non-CV factors is recommended.                                                                                                                                                                                                                                                                                                                                                                                                                                                                                                         | I                  | B                  | 11, 31, 32       |
|                                | Transthoracic echocardiography is the method of choice for assessment of myocardial systolic and diastolic function of both left and right ventricles.                                                                                                                                                                                                                                                                                                                                                                                                                        | I                  | A                  | 11, 31, 33       |
|                                | 12-lead ECG is recommended in all patients with HF in order to determine heart rhythm, heart rate, QRS morphology and duration, and to detect other relevant abnormalities. This information is needed to plan and monitor treatment.                                                                                                                                                                                                                                                                                                                                         | I                  | C                  |                  |
|                                | The following diagnostic tests are recommended for initial assessment of a patient with newly diagnosed HF in order to evaluate the patient's suitability for particular therapies, to detect reversible/treatable causes of HF and co-morbidities interfering with HF: blood testing (natriuretic peptides, complete blood count – haemoglobin/hematocrit, WBC and platelet counts – potassium, sodium, creatinine with estimated GFR-, C-reactive protein, uric acid, liver function tests, fasting glucose, HbA1c, fasting lipid profile, TSH, ferritin, TSAT, iron/TIBC). | I                  | B                  | 11, 31, 33       |
|                                | Additional laboratory tests should be considered in patients admitted due to acute HF based on clinical indications.                                                                                                                                                                                                                                                                                                                                                                                                                                                          | IIa                | C                  |                  |
|                                | Chest X-ray is recommended in patients with HF to detect/exclude alternative pulmonary or other diseases, which may contribute to dyspnoea. It may also identify pulmonary congestion/oedema and is more useful in patients with suspected HF in the acute setting.                                                                                                                                                                                                                                                                                                           | I                  | C                  |                  |
|                                | Exercise testing (ergospirometry if available) should be considered in patients with HF to prescribe adequate exercise training programme and to discriminate the origin of unexplained dyspnoea.                                                                                                                                                                                                                                                                                                                                                                             | IIa                | C                  | 34               |
|                                | Exercise testing (ergospirometry if available) may be considered in patients with HF to detect reversible myocardial ischaemia.                                                                                                                                                                                                                                                                                                                                                                                                                                               | IIb                | C                  | 33               |
|                                | Exercise testing (ergospirometry if available) is recommended in patients with HF as a part of the evaluation of patients for heart transplantation and/or mechanical circulatory support.                                                                                                                                                                                                                                                                                                                                                                                    | I                  | C                  | -                |
|                                | Other imaging and non-imaging diagnostic tests should be considered in selected clinical situations.                                                                                                                                                                                                                                                                                                                                                                                                                                                                          | IIa                | B                  | 11, 31, 32       |
|                                | Physical activity counselling is recommended.                                                                                                                                                                                                                                                                                                                                                                                                                                                                                                                                 | I                  | B                  | 11, 31, 32       |
| <b>Exercise training</b>       | Aerobic exercise training is recommended.                                                                                                                                                                                                                                                                                                                                                                                                                                                                                                                                     | I                  | A                  | 35, 36           |
|                                | High intensity interval training may be considered in selected patients.                                                                                                                                                                                                                                                                                                                                                                                                                                                                                                      | IIb                | B                  | 37               |
|                                | Respiratory training should be considered.                                                                                                                                                                                                                                                                                                                                                                                                                                                                                                                                    | IIa                | B                  | 17, 38           |
|                                | Resistance training may be considered.                                                                                                                                                                                                                                                                                                                                                                                                                                                                                                                                        | IIb                | C                  | 17, 38           |
|                                | Weight control, cachexia and obesity management is recommended. (refer also to section 3a.6).                                                                                                                                                                                                                                                                                                                                                                                                                                                                                 | I                  | C                  | 11, 31, 32       |
|                                | Diet/nutritional counselling should be considered. (refer also to section 3a.5).                                                                                                                                                                                                                                                                                                                                                                                                                                                                                              | IIa                | C                  | 11, 31, 32       |
| <b>Psychosocial management</b> | Psychosocial screening should be considered. (refer to section 2.4.2).                                                                                                                                                                                                                                                                                                                                                                                                                                                                                                        | IIa                | C                  | 11, 31, 32       |
|                                | Psychosocial management is recommended. (refer to section 3a.1 and 3a.2).                                                                                                                                                                                                                                                                                                                                                                                                                                                                                                     | I                  | A                  | 11, 31, 32       |
|                                | Self-care management should be considered.                                                                                                                                                                                                                                                                                                                                                                                                                                                                                                                                    | IIa                | B                  | 11, 32           |
|                                | Home care monitoring should be considered.                                                                                                                                                                                                                                                                                                                                                                                                                                                                                                                                    | IIa                | B                  | 11, 32           |

CV = cardiovascular; GFR = glomerular filtration rate; HbA1c = glycated haemoglobin; HF = heart failure; TIBC = total iron-binding capacity; TSAT = transferrin saturation; TSH = thyroid-stimulating hormone; WBC = white blood cells.

<sup>a</sup>Class of recommendation.

<sup>b</sup>Level of evidence.

<sup>c</sup>Reference(s) supporting recommendations.

HF is a common, disabling and deadly disease that leads to frequent hospital admissions due to CV events.<sup>39</sup> HF patients are at high risk and they deserve special attention throughout a multifaceted and multidisciplinary intervention, starting as soon as possible during<sup>26</sup> and after<sup>31</sup> hospital admission in order to develop a lifelong structured prevention course. In-hospital, clinical management and risk

assessment are decisive,<sup>11,32</sup> and selection of a test in daily practice should consider availability, local expertise and advantages/disadvantages, and in the case of several questions, which test can best answer them. CV prevention extends also to physical activity counselling, psychological support and patient/caregiver management education.<sup>31</sup> The clinical stage may impact recommendations for



preventive measures, as advanced HF might be associated with low BP and lipid profile, concomitant CV and non-CV diseases [such as AF, ventricular arrhythmia, non-revascularizable CAD, previous stroke/transient ischaemic attack (TIA), diabetes, anaemia, iron deficiency, chronic obstructive pulmonary disease, renal failure, liver dysfunction, sleep apnoea, cognitive impairment, depression, etc.] and future strategies (device therapy, heart transplantation and mechanical circulatory support) that require specialized interventions.<sup>11</sup>

Although congestion management is critical to improving symptoms and readmission risk, management extends beyond diuresis alone, and prevention of adverse CV events requires reducing cardiac injury, inhibiting maladaptive systemic responses and controlling relevant co-morbidities. Lifesaving HF therapies should be prescribed as recommended.<sup>11</sup> While the patient's condition and clinical progress are informative, monitoring systems that rely less on patient input are attractive.<sup>40</sup> Since most readmissions for HF exacerbations are attributable, at least in part, to poor self-care, non-adherence to medications and dietary advice and failure to act upon escalating symptoms, effective self-care is essential for CV prevention.<sup>41</sup>

Before leaving the hospital, several issues should be considered and discussed with the patient and caregivers. A discharge plan should be organized to build an appropriate management strategy aimed at preventing CV readmissions: congestion should be absent and a stable oral diuretic regimen established for at least 48 h.<sup>11</sup> Long-term disease-modifying therapy should be optimized as much as possible and appropriate education provided to the patient and family/caregivers. Pre- and post-discharge management should follow the standards of care and goals of treatment suggested by the ESC guidelines.<sup>11</sup>

Exercise training (ET) should be prescribed in outpatients as a fundamental preventive action in stable HF.<sup>35,36</sup> Since HF patients experience exercise intolerance due to several maladaptive changes, even when on optimal HF medical therapy,<sup>42,43</sup> exercise training can help reduce symptoms and impacts outcome. The Heart Failure: A Controlled Trial Investigating Outcomes of Exercise Training (HF-ACTION) trial showed a 7% reduction in all-cause mortality and all-cause hospitalization, even after adjustment for prespecified predictors of mortality.<sup>36</sup> However, adherence is crucial<sup>44</sup> and exercise intensity should be a balance between efficacy and safety.<sup>45</sup> ET protocols vary in most trials (see also section 3a.3), even though moderate to vigorous intensity exercise (50–60% peak  $\dot{V}O_2$ ) is frequently employed, leading to an average 17% improvement in peak oxygen consumption.<sup>46</sup> In selected stable patients, high-intensity interval training may yield even greater improvements in peak  $\dot{V}O_2$ .<sup>37</sup> Before commencing any ET programme, clinical stability and functional evaluations are warranted,<sup>17,38</sup> and a comprehensive flowchart has been proposed.<sup>38</sup>

Prevention recommendations and intervention modalities in HF with preserved left ventricular ejection fraction HF are similar to that of HF with reduced ejection fraction; in particular, ET therapy has been shown to be effective and should be recommended.<sup>47–49</sup>

# Gap in evidence

- Biomarkers may guide therapy in HF hospitalized patients, but further evidence is needed.

## 3b.4 Cerebrovascular disease

### Key message

- CV risk management in patients with previous TIA or ischaemic stroke is generally comparable to that in patients with other ischaemic complications of atherosclerosis. However, treatments may differ between stroke types (ischaemic stroke, intracerebral haemorrhage, subarachnoid haemorrhage or cerebral venous sinus thrombosis) and causes.

### Recommendation for cerebrovascular disease

| Recommendation                                                                                                                                                                                                                | Class <sup>a</sup> | Level <sup>b</sup> | Ref <sup>c</sup> |
|-------------------------------------------------------------------------------------------------------------------------------------------------------------------------------------------------------------------------------|--------------------|--------------------|------------------|
| In patients with TIA or stroke, it is recommended to investigate the cause of the event and institute a cardiovascular disease prevention programme tailored to type and cause of stroke (specific guidelines are available). | I                  | A                  | 2, 50–53         |

TIA = transient ischaemic attack.

<sup>a</sup>Class of recommendation.

<sup>b</sup>Level of evidence.

<sup>c</sup>Reference(s) supporting recommendations.

CV risk management in patients with previous TIA or ischaemic stroke is generally comparable to that in patients with other ischaemic complications of atherosclerosis. However, treatment may differ between stroke types (ischaemic stroke, intracerebral haemorrhage, subarachnoid haemorrhage or cerebral venous sinus thrombosis) and causes (e.g. cardio-embolism, large artery atherosclerosis or small vessel disease are the most important of many potential causes of ischaemic stroke). Details can be found in recent practice guidelines.<sup>2,50–53</sup> This paragraph will discuss some aspects specific to patients with TIA or stroke.

In patients with TIA or stroke included in the randomised Heart Protection Study or Stroke Prevention by Aggressive Reduction in Cholesterol Levels (SPARCL) trial, either 40 mg of simvastatin or 80 mg of atorvastatin reduced the long-term risk of major CV events, but only atorvastatin reduced the risk of recurrent stroke.<sup>54,55</sup> Most of the included patients had had an ischaemic brain event, and the number of patients with prior intracerebral or subarachnoid haemorrhage included in statin trials was too small to recommend either starting a statin or withdrawing any statin the patient was using at the time of the haemorrhage.<sup>51</sup> This also applies to patients with TIA or ischaemic stroke of cardioembolic origin. Despite earlier suggestions to the contrary, there is no evidence that the use of statins is associated with an increased risk of intracerebral haemorrhage.<sup>56</sup> There are insufficient data on the effects

of other statins or other cholesterol-lowering treatments in patients with TIA or stroke, and there are also no relevant data supporting the benefit of aiming for a specific LDL-C target in this population.<sup>50</sup>

Starting BP reduction in the first 48 h after stroke onset generally does not improve outcome,<sup>57,58</sup> except possibly in patients who had a spontaneous intracerebral haemorrhage within the previous 6 h and who have a systolic blood pressure (SBP) of  $\geq 150$  mmHg or above. In these patients, intensive BP lowering (with a target systolic level  $< 140$  mmHg reached within 1 h) likely has a modest benefit.<sup>59</sup>

In patients with stroke or TIA that occurred  $> 1$  week earlier, the use of BP-lowering drugs reduces the risk of CAD or (recurrent) stroke.<sup>60</sup> The optimal drug regimen in this population is uncertain, because just a few strategies have been tested in sufficiently large trials. The evidence of benefit is greatest for diuretics alone or diuretics in combination with an ACE-I.<sup>50,61</sup> In the Perindopril Protection Against Recurrent Stroke Study (PROGRESS), the relative reduction in the risk of recurrent stroke with the combination of indapamide and perindopril was independent of the baseline BP<sup>62</sup> and the risk reduction was larger with larger reductions in SBP.<sup>63</sup> However, data are limited and the evidence is not conclusive. For this reason, it appears reasonable to base the choice of a specific drug and BP target on individual patient characteristics, as described elsewhere in this guideline.

In patients with TIA or ischaemic stroke of presumed atherosclerotic origin, the combination of aspirin 30–300 mg daily and dipyridamole 200 mg twice daily is associated with a larger reduction in the risk of a major CV event than aspirin alone.<sup>64</sup> Clopidogrel 75 mg daily is as effective as the combination of aspirin and dipyridamole, but is associated with fewer side effects.<sup>65</sup> Patients with TIA or ischaemic stroke of presumed cardioembolic origin or stenosis of the carotid or vertebral artery should be treated according to the relevant guidelines.<sup>2,50</sup>

There is a marked lack of evidence on CVD prevention in patients with unruptured intracranial aneurysms and on secondary prevention after intracerebral haemorrhage during treatment with oral anticoagulation or subarachnoid haemorrhage, and randomized trials for these conditions are warranted.

### Gaps in evidence

- For patients with cryptogenic stroke, it is uncertain whether non-vitamin K antagonist oral anticoagulants reduce the risk of future CV events more than antiplatelet drugs.
- The optimal secondary prevention strategy after subarachnoid haemorrhage is uncertain.

## 3b.5 Peripheral artery disease

### Key message

- Peripheral artery disease (PAD) is asymptomatic in a large cohort of patients.
- Preventive treatment is identical to coronary and carotid prevention treatment, but specific studies for the PAD population and specific treatment targets are lacking.

### Recommendations for peripheral artery disease

| Recommendations                                                                              | Class <sup>a</sup> | Level <sup>b</sup> | Ref <sup>c</sup> |
|----------------------------------------------------------------------------------------------|--------------------|--------------------|------------------|
| In all PAD patients BP values controlled to values below 140/90 mmHg are recommended.        | I                  | A                  | 66-68            |
| Antiplatelet therapy is recommended.                                                         | I                  | A                  | 69               |
| Statin therapy is recommended.                                                               | I                  | A                  | 70               |
| ACE-I therapy is recommended in patients with symptomatic PAD in patients with hypertension. | I                  | A                  | 66               |
| Exercise training is recommended in all patients with PAD.                                   | I                  | A                  | 71               |
| It is recommended that all patients with PAD who smoke should be advised to stop smoking.    | I                  | B                  | 72               |
| ACE-I therapy should be considered in patients with symptomatic PAD without hypertension.    | IIa                | A                  | 66               |
| $\beta$ -blockers should be considered.                                                      | IIa                | B                  | 73               |

ACE-I = angiotensin-converting enzyme inhibitors; BP = blood pressure; PAD = peripheral artery disease.

<sup>a</sup>Class of recommendation.

<sup>b</sup>Level of evidence.

<sup>c</sup>Reference(s) supporting recommendations.

The primary non-invasive test for the diagnosis of lower extremity PAD is the ankle-brachial index (ABI). In healthy persons, the ABI is  $> 1.0$ . Usually an ABI  $< 0.90$  is used to define PAD. The actual sensitivity and specificity have been estimated at 79% and 96%, respectively.<sup>74</sup> For diagnosis in primary care, an ABI  $< 0.8$  or the mean of three ABIs  $< 0.90$  had a positive predictive value of  $\geq 95\%$ ; an ABI  $> 1.10$  or the mean of three ABIs  $> 1.00$  had a negative predictive value of  $\geq 99\%$ .<sup>75</sup>

The German Epidemiologic Trial on Ankle Brachial Index Study Group included 6880 patients  $\geq 65$  years of age and demonstrated that 21% of the cohort had either asymptomatic or symptomatic PAD.<sup>76</sup>

The level of ABI also correlates with PAD severity, with a high risk of amputation when the ABI is  $< 0.50$ . An ABI change  $> 0.15$  is generally required to consider worsening of limb perfusion over time or improvement of limb perfusion after revascularization.

Smoking is an important risk factor for PAD. In the general population, smoking increased the risk of PAD between two- and six-fold.<sup>72</sup>

Statins reduce the risk of mortality, CV events and stroke in patients with PAD with and without CAD.<sup>70</sup> The Antithrombotic Trialists' Collaboration meta-analysis<sup>69</sup> combined data from 42 randomized studies of 9706 patients with intermittent claudication and/or peripheral arterial bypass or angioplasty. The incidence of

vascular death, non-fatal MI and non-fatal stroke at follow-up was significantly decreased, by 23%, by antiplatelet drugs with respect to placebo. The efficacy of clopidogrel compared with aspirin was studied in the randomized Clopidogrel versus Aspirin in Patients at Risk for Ischaemic Events (CAPRIE) trial, including a subgroup of 6452 patients with PAD.<sup>77</sup> At 1.9 years follow-up, the annual combined incidence of vascular death, non-fatal MI and non-fatal stroke in the PAD group was 3.7% and 4.9% in the clopidogrel and aspirin groups, respectively, with a significant 23.8% decrease with clopidogrel, and no major differences in terms of safety.

Treatment with ACE-Is has shown a beneficial effect beyond a BP decrease in high-risk groups. In the Heart Outcomes Prevention Evaluation (HOPE) trial, ramipril significantly reduced cardiovascular events by 25% in patients with symptomatic PAD without known low ejection fraction or HF.<sup>66</sup> The ONTARGET trial showed the equivalence of telmisartan to ramipril in these patients.<sup>67</sup>

Importantly,  $\beta$ -blockers are not contraindicated in patients with PAD. A meta-analysis of 11 randomized controlled studies found that  $\beta$ -blockers did not adversely affect walking capacity or symptoms of intermittent claudication in patients with mild to moderate PAD.<sup>73</sup>

Symptoms can be treated conservatively or invasively. In patients with PAD, training therapy is effective in improving symptoms and increasing exercise capacity. In meta-analyses,<sup>71</sup> compared with usual care or placebo, exercise significantly improved maximal walking time, with an overall improvement in walking ability. The types of exercise varied from strength training to pole striding and upper or lower limb exercises, generally in supervised sessions, at least twice a week. Cilostazol, naftidrofuryl and pentoxifylline improve pain-free distance. For other options, please refer to the ESC Guidelines on the diagnosis and treatment of peripheral arterial disease.<sup>70</sup>

#### Gap in evidence

- There are few studies specific for the PAD population. Most of the data comes from CAD patients with concomitant PAD. More specific data on the PAD population are needed.

## 4. Web Figures

- (A) Predicted vascular deaths avoided over 5 years from reductions in low-density lipoprotein cholesterol (LDL-C) with statin treatment at different levels of cardiovascular disease risk; the higher the baseline risk, the higher the number of deaths

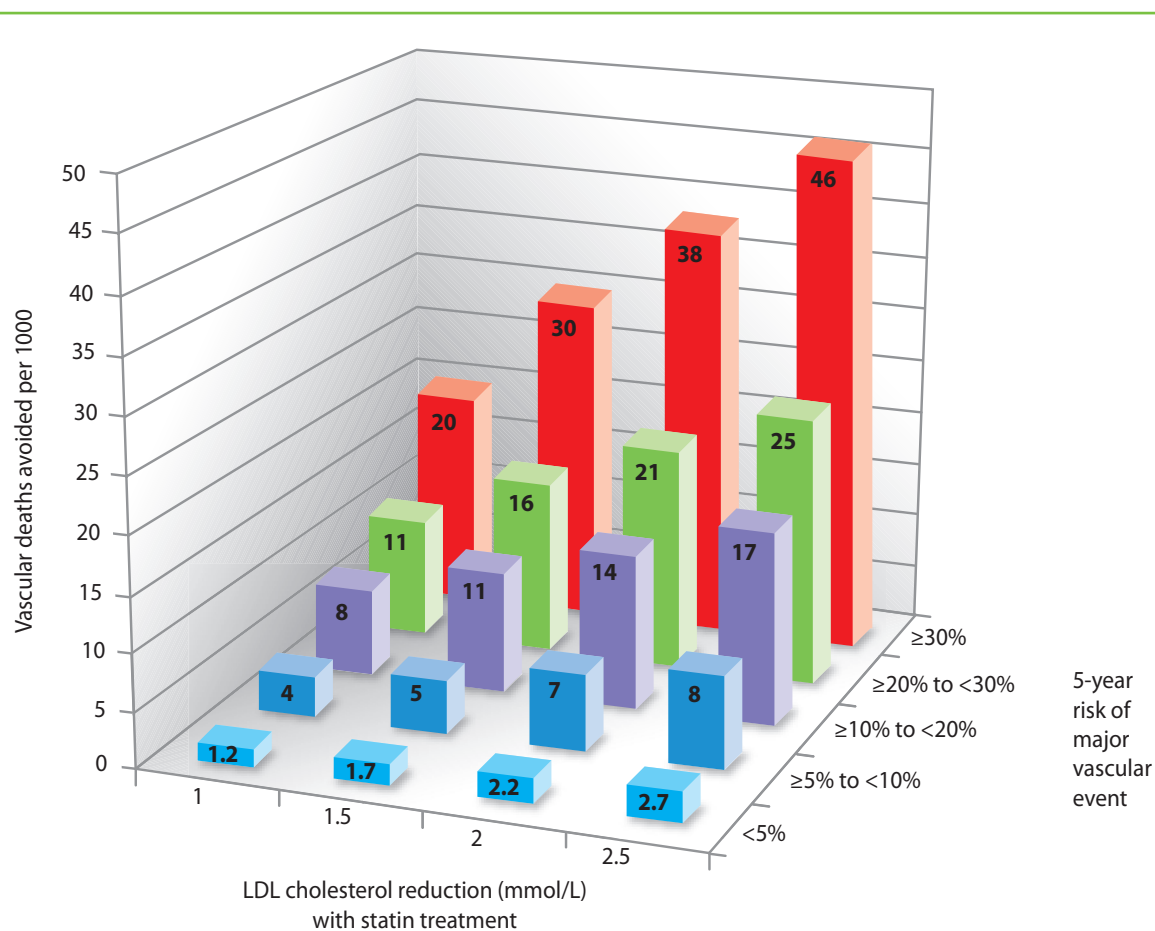

**Web Figure A** Predicted vascular deaths avoided over 5 years from reductions in low-density lipoprotein (LDL-C) with statin treatment at different levels of cardiovascular disease risks [Jackson R, Kerr A, Wells S. Vascular risk calculators essential but flawed clinical tools? *Circulation* 2013;127:1929–1931].



avoided by appropriate interventions [Jackson R, Kerr A, Wells S. Vascular risk calculators essential but flawed clinical tools? *Circulation* 2013;**127**:1929–1931].

- (B) SCORE chart for use in low-risk regions: HDL 0.8 mmol/L.
- (C) SCORE chart for use in low-risk regions: HDL 1.0 mmol/L.
- (D) SCORE chart for use in low-risk regions: HDL 1.4 mmol/L.
- (E) SCORE chart for use in low-risk regions: HDL 1.8 mmol/L.
- (F) SCORE chart for use in high-risk regions: HDL 0.8 mmol/L.

- (G) SCORE chart for use in high-risk regions: HDL 1.0 mmol/L.
- (H) SCORE chart for use in high-risk regions: HDL 1.4 mmol/L.
- (I) SCORE chart for use in high-risk regions: HDL 1.8 mmol/L.
- (J) Lifetime risk calculator based on the Joint British Societies recommendations on the prevention of cardiovascular disease (JBS3) web-based tool.
- (K) Modified World Health Organization (WHO) smoking cessation algorithm.

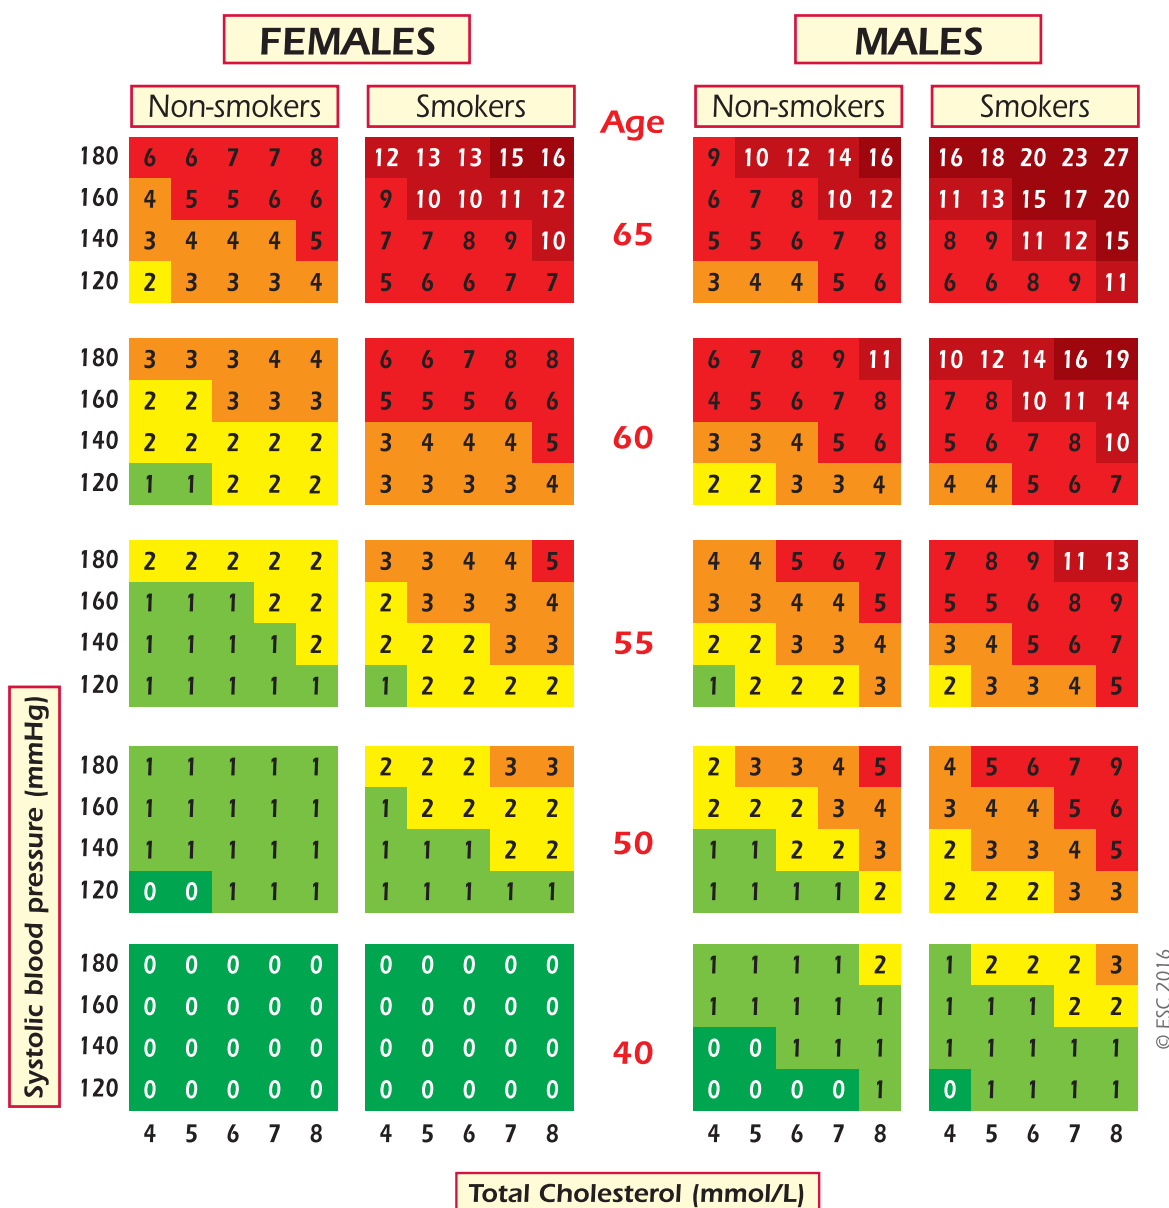

**Web Figure B** SCORE chart for use in low-risk regions – HDL 0.8 mmol/L. HDL = high-density lipoprotein; SCORE = Systematic Coronary Risk Estimation.

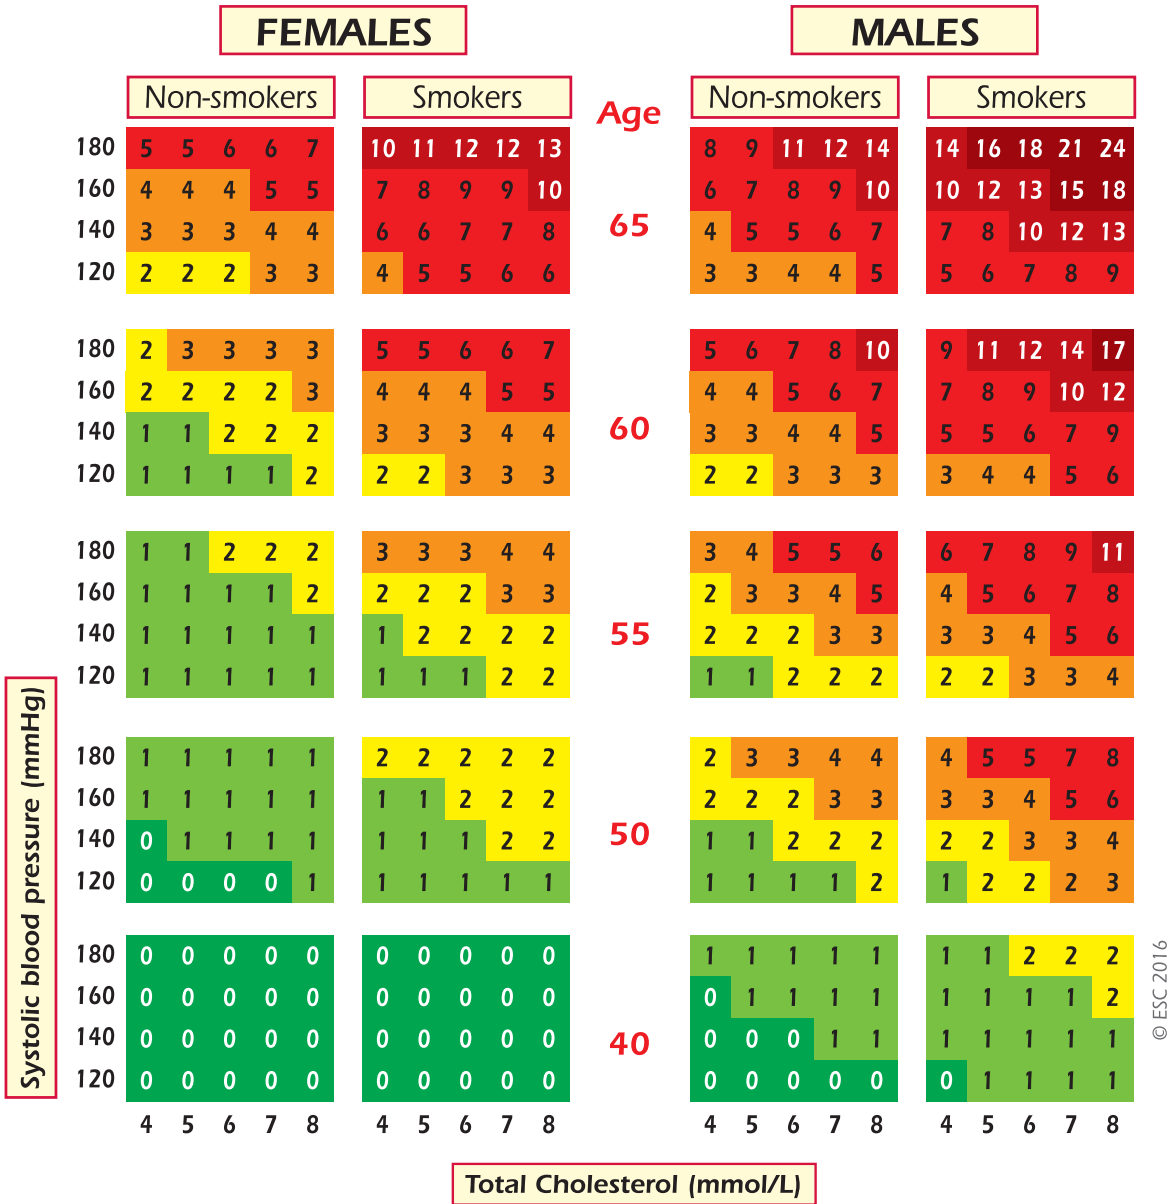

**Web Figure C** SCORE chart for use in low-risk regions – HDL 1.0 mmol/L. HDL = high-density lipoprotein; SCORE = Systematic Coronary Risk Estimation.

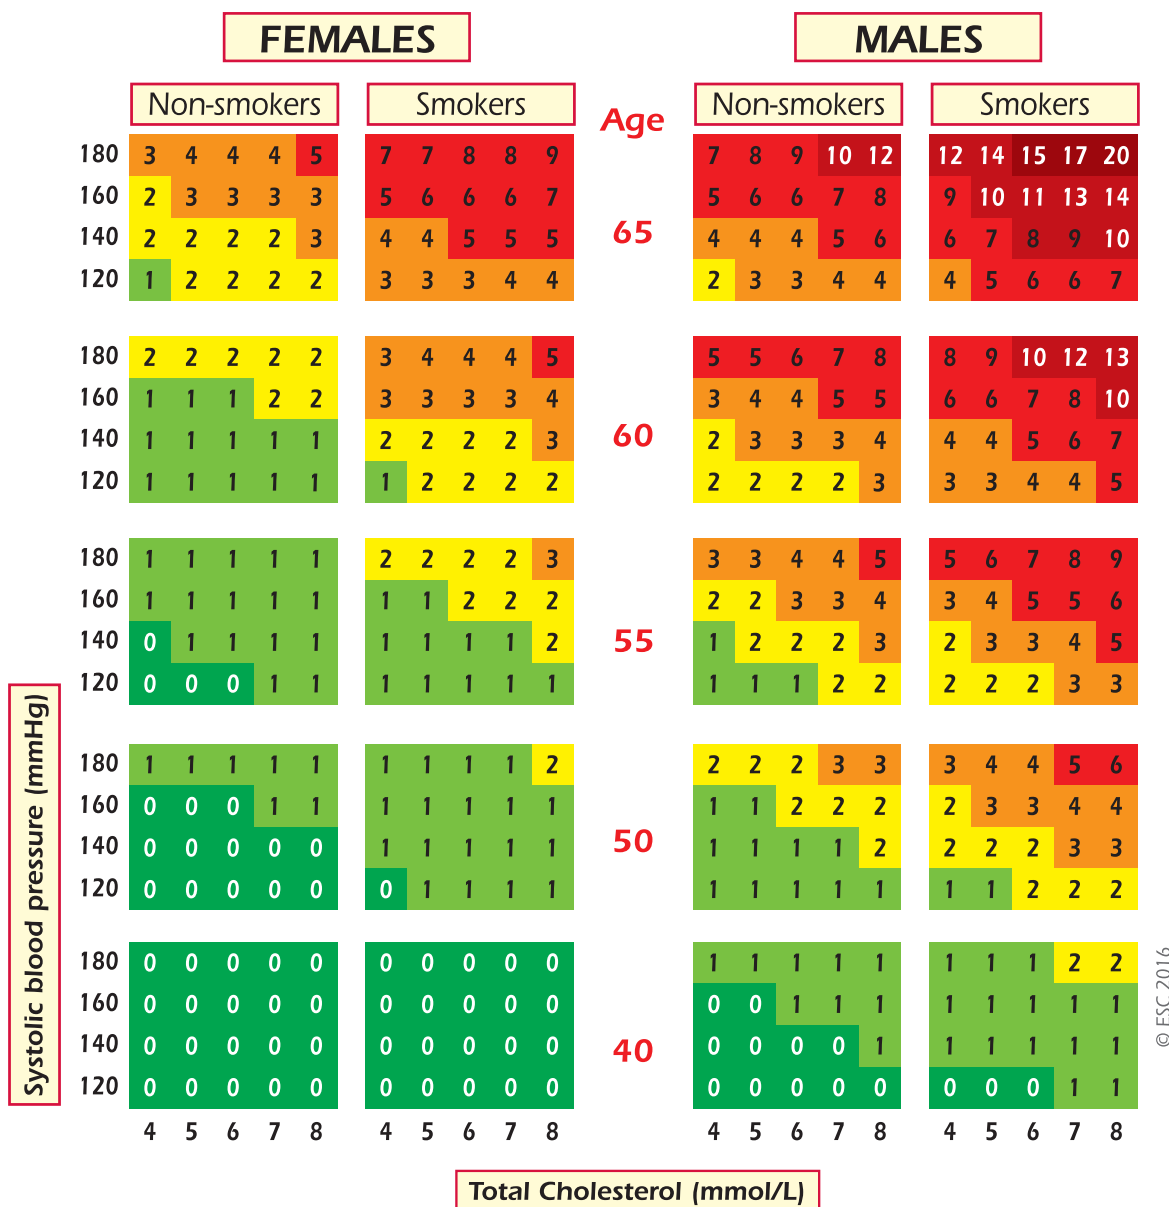

**Web Figure D** SCORE chart for use in low-risk regions – HDL 1.4 mmol/L. HDL = high-density lipoprotein; SCORE = Systematic Coronary Risk Estimation.

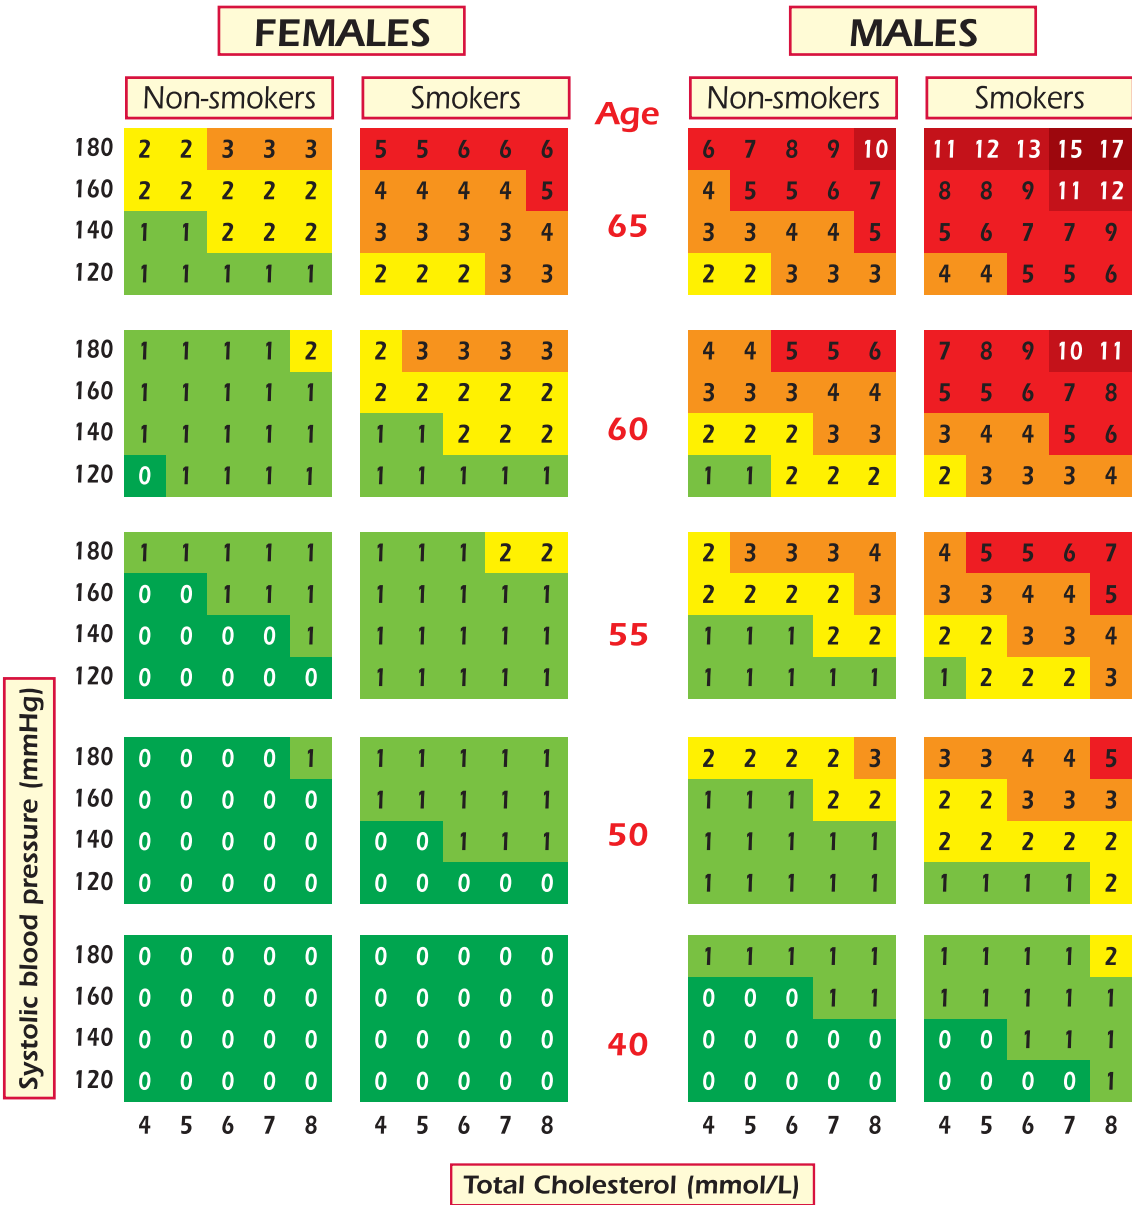

**Web Figure E** SCORE chart for use in low-risk regions – HDL 1.8 mmol/L. HDL = high-density lipoprotein; SCORE = Systematic Coronary Risk Estimation.

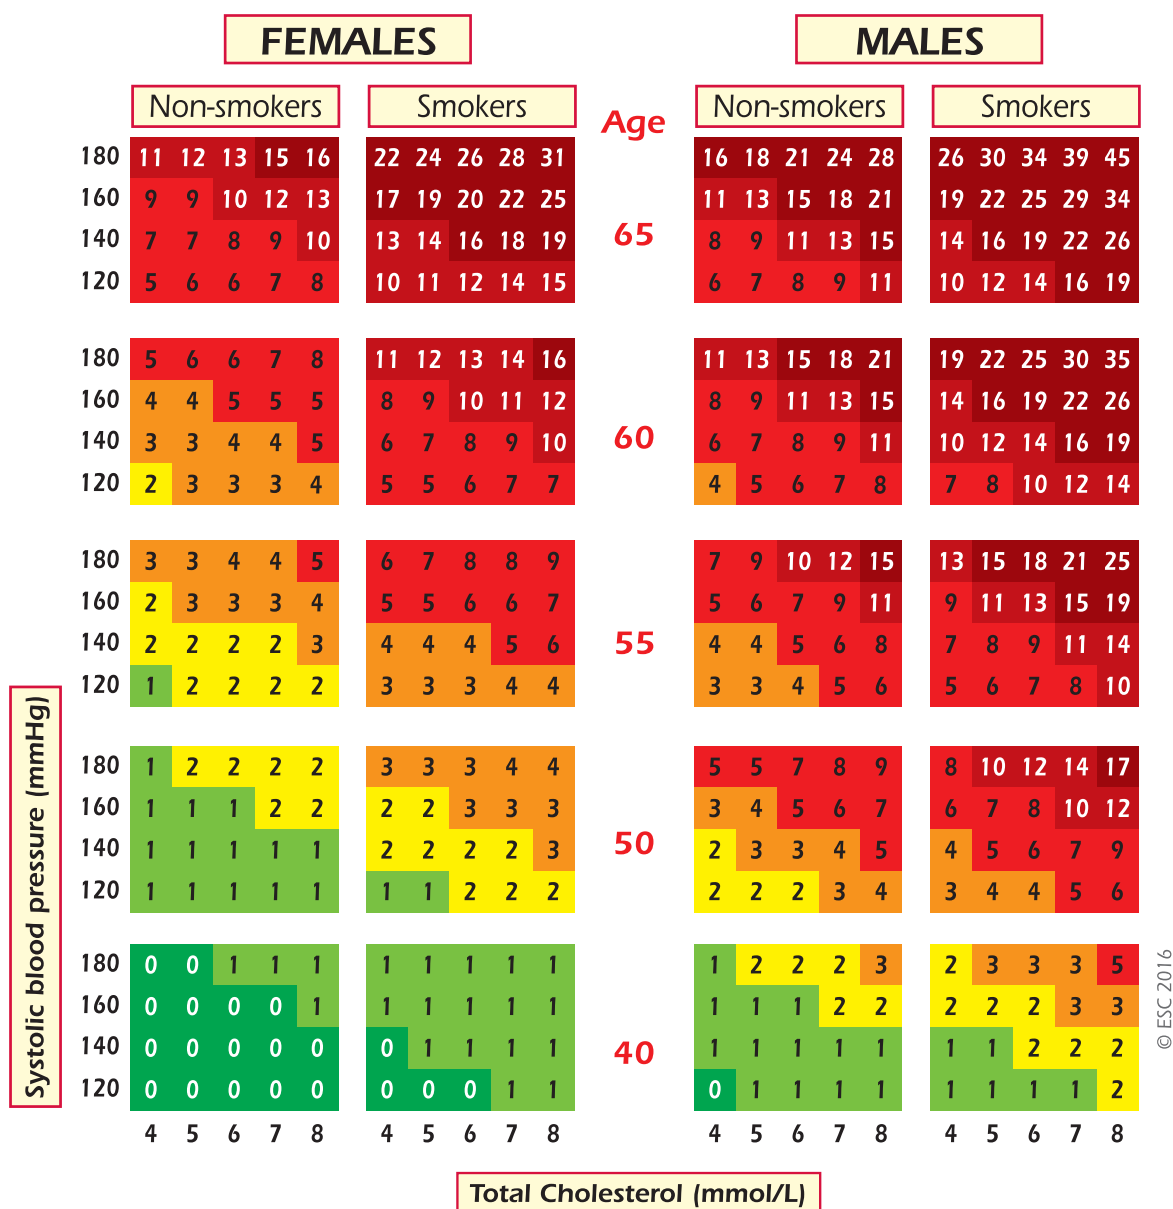

**Web Figure F** SCORE chart for use in high-risk regions – HDL 0.8 mmol/L. HDL = high-density lipoprotein; SCORE = Systematic Coronary Risk Estimation.



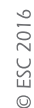

**Web Figure G** SCORE chart for use in high-risk regions – HDL 1.0 mmol/L. HDL = high-density lipoprotein; SCORE = Systematic Coronary Risk Estimation.

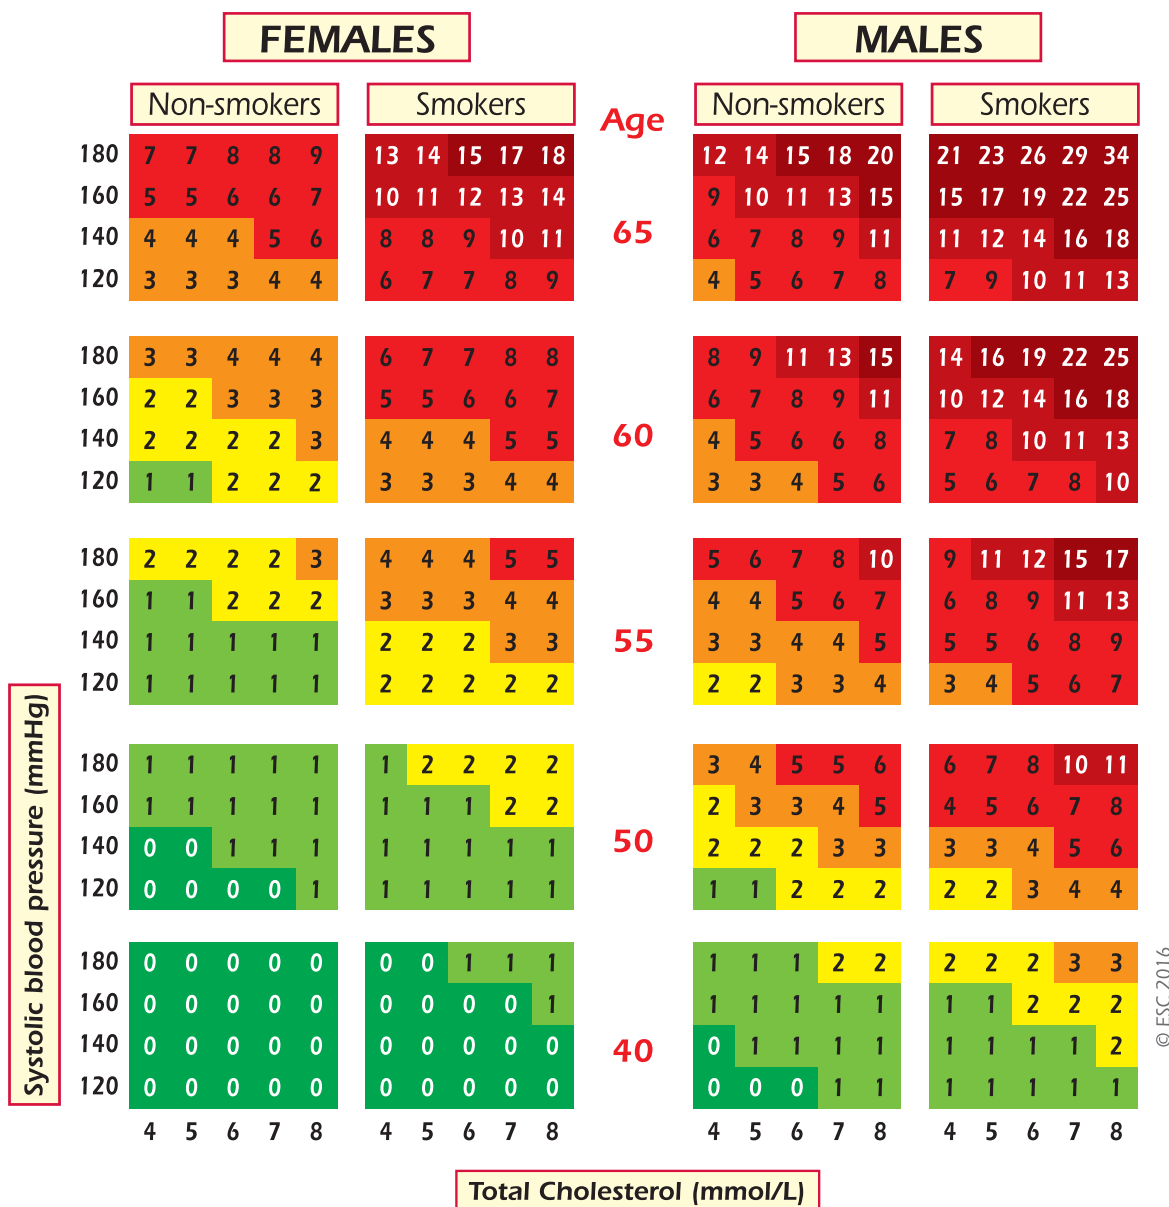

**Web Figure H** SCORE chart for use in high-risk regions – HDL 1.4 mmol/L. HDL = high-density lipoprotein; SCORE = Systematic Coronary Risk Estimation.

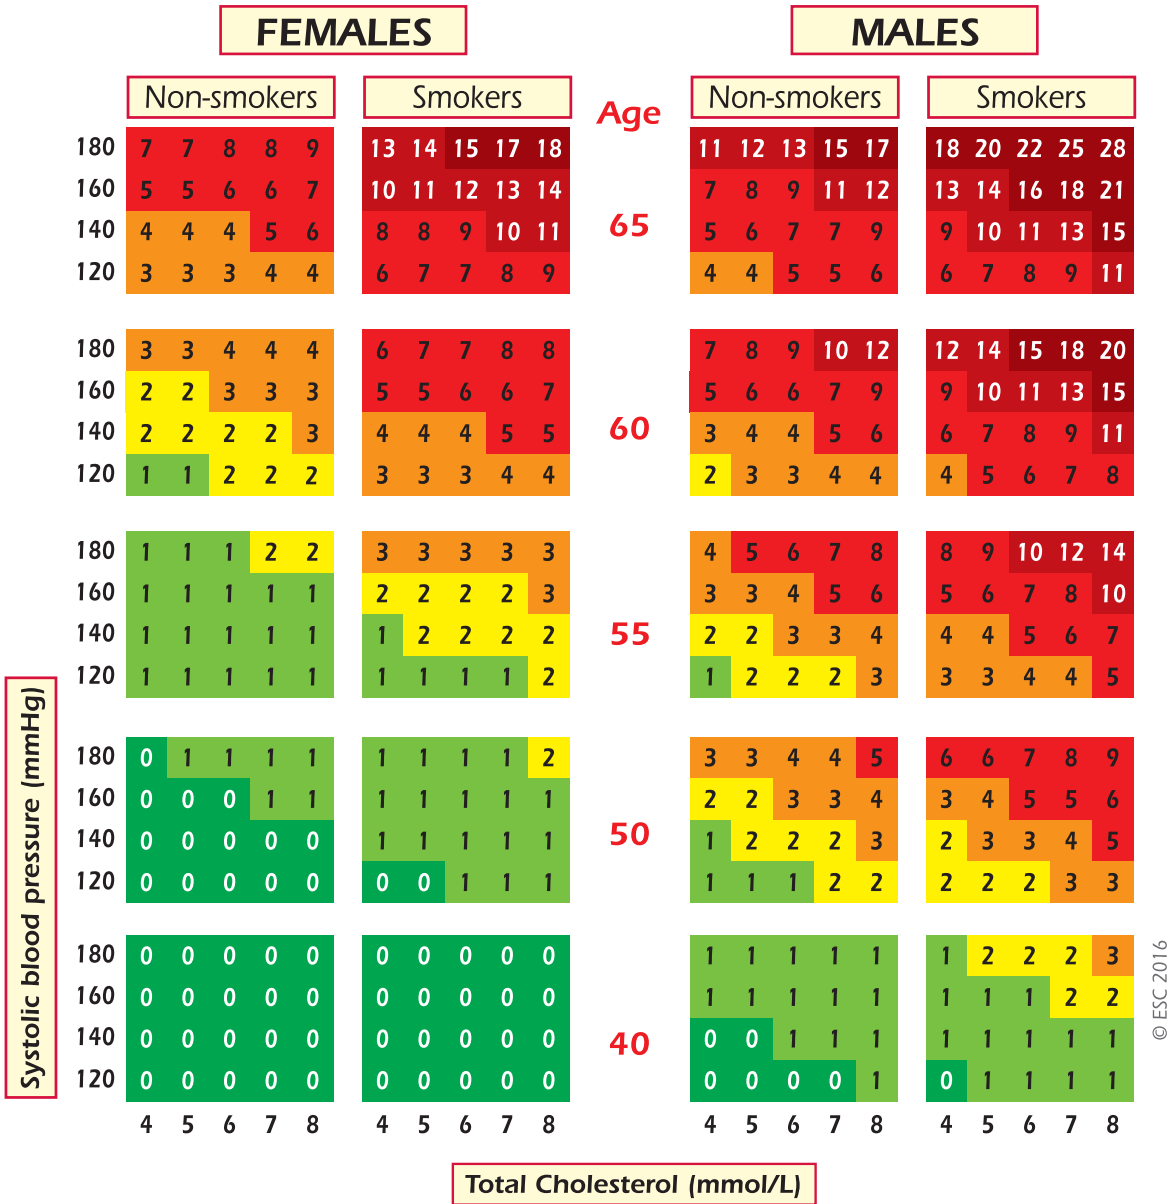

**Web Figure I** SCORE chart for use in high-risk regions – HDL 1.8 mmol/L. HDL = high-density lipoprotein; SCORE = Systematic Coronary Risk Estimation.

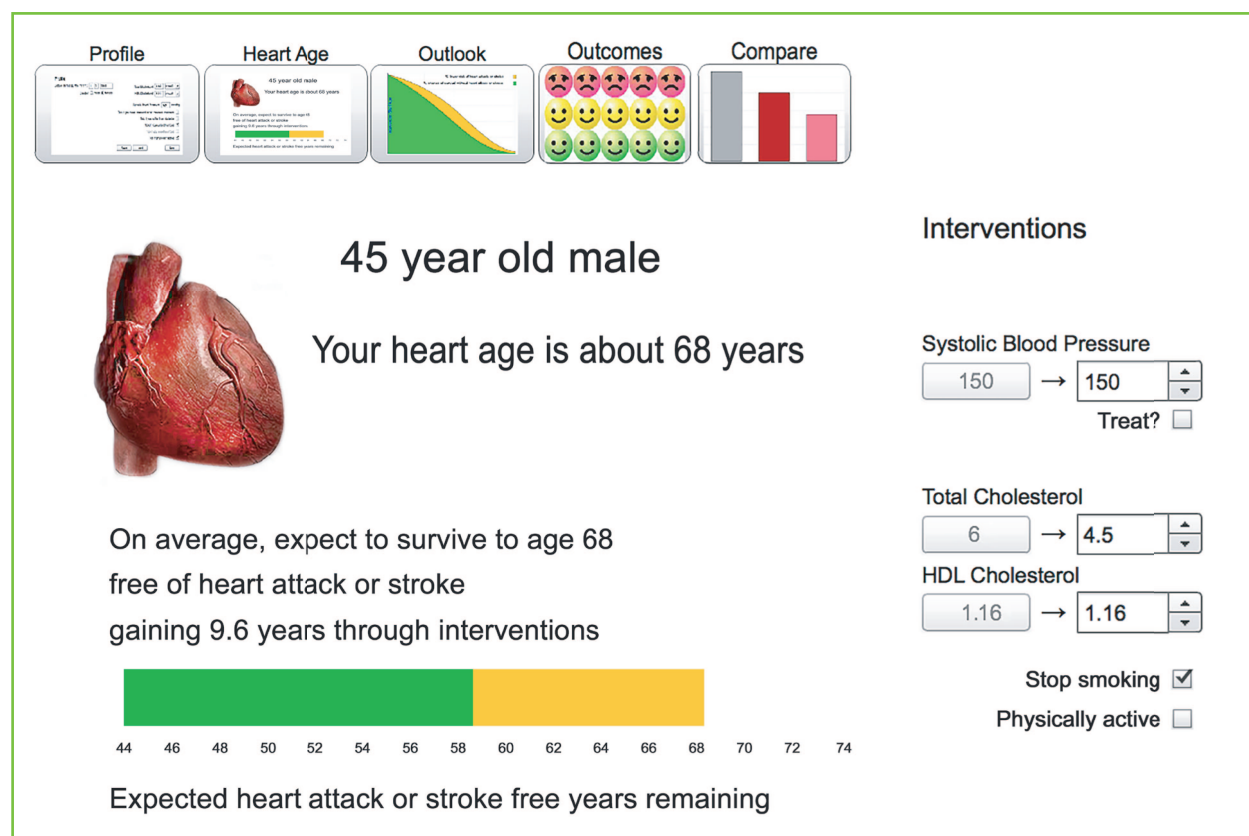

**Web Figure J** Lifetime risk calculator based on the JBS3 web-based tool.

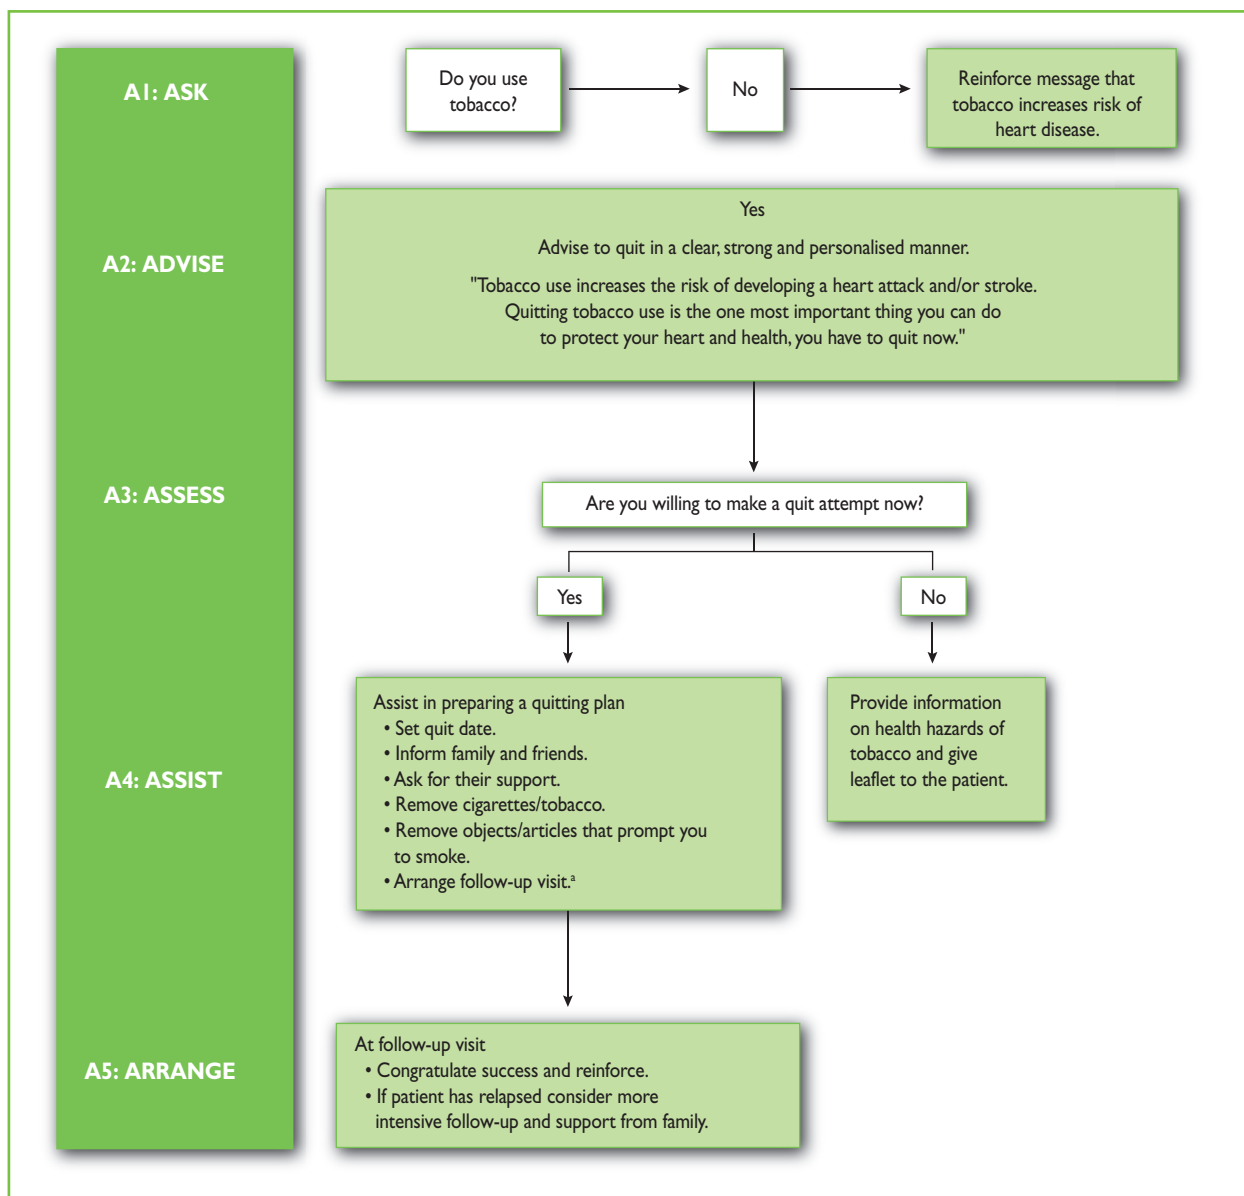

**Web Figure K** Modified World Health Organization (WHO) smoking cessation algorithm. <sup>a</sup>Ideally second follow-up visit is recommended within the same month and every month thereafter for 4 months and evaluation after one year. If not feasible, reinforce counselling whenever the patient is seen for blood pressure monitoring. Taken with permission from WHO CVD risk management package.



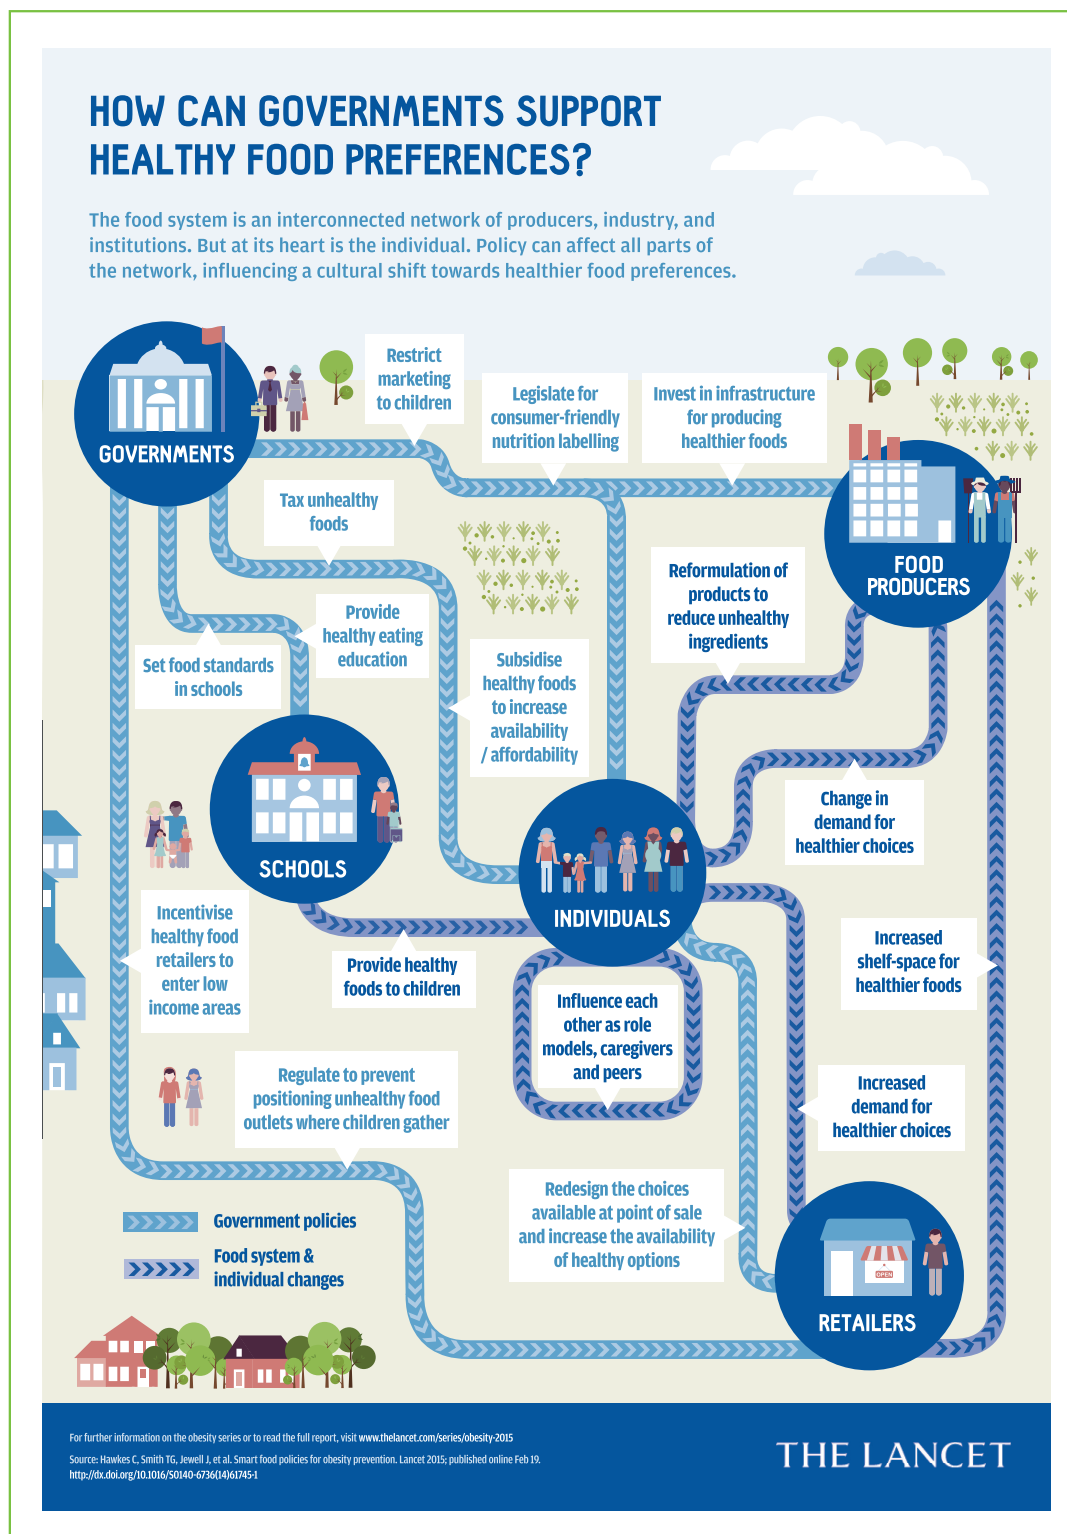

**Web Figure L** How can governments support healthy food preferences? (Taken with permission from The Lancet)

(L) How can governments support healthy food preferences?

## 5. Web Tables

(A) Different risk factor combinations for more accurate estimation of risk ages

(B) Self-assessment questionnaires PAR-Q & YOU

(C) World Health Organization classification of body weight according to body mass index in adults

(D) Measures of general obesity and abdominal adiposity

**Web Table A** Table for different risk factor combinations for more accurate estimation of risk ages.

| Systolic<br>blood<br>pressure<br>(mmHg) | WOMEN       |     |     |     |    |         |     |     |     |    | MEN         |     |     |     |    |         |     |     |     |    |
|-----------------------------------------|-------------|-----|-----|-----|----|---------|-----|-----|-----|----|-------------|-----|-----|-----|----|---------|-----|-----|-----|----|
|                                         | Non-Smokers |     |     |     |    | Smokers |     |     |     |    | Non-Smokers |     |     |     |    | Smokers |     |     |     |    |
|                                         | 180         | 160 | 140 | 120 | 80 | 180     | 160 | 140 | 120 | 80 | 180         | 160 | 140 | 120 | 80 | 180     | 160 | 140 | 120 | 80 |
| 180                                     | 78          | 73  | 69  | 65  | 78 | 80      | 75  | 71  | 66  | 76 | 72          | 68  | 64  | 60  | 71 | 66      | 62  | 58  | 54  | 50 |
| 160                                     | 73          | 68  | 64  | 60  | 73 | 69      | 65  | 61  | 57  | 66 | 62          | 58  | 54  | 50  | 61 | 56      | 52  | 48  | 44  | 40 |
| 140                                     | 69          | 64  | 60  | 56  | 69 | 65      | 61  | 57  | 53  | 62 | 58          | 54  | 50  | 46  | 57 | 52      | 48  | 44  | 40  | 36 |
| 120                                     | 65          | 60  | 56  | 52  | 65 | 61      | 57  | 53  | 49  | 58 | 54          | 50  | 46  | 42  | 53 | 48      | 44  | 40  | 36  | 32 |
| 80                                      | 78          | 73  | 69  | 65  | 78 | 80      | 75  | 71  | 66  | 76 | 72          | 68  | 64  | 60  | 71 | 66      | 62  | 58  | 54  | 50 |
| 180                                     | 72          | 68  | 64  | 60  | 72 | 68      | 64  | 60  | 56  | 65 | 61          | 57  | 53  | 49  | 60 | 55      | 51  | 47  | 43  | 39 |
| 160                                     | 68          | 63  | 59  | 55  | 68 | 64      | 60  | 56  | 52  | 61 | 57          | 53  | 49  | 45  | 56 | 51      | 47  | 43  | 39  | 35 |
| 140                                     | 64          | 59  | 55  | 51  | 64 | 60      | 56  | 52  | 48  | 57 | 53          | 49  | 45  | 41  | 52 | 47      | 43  | 39  | 35  | 31 |
| 120                                     | 60          | 55  | 51  | 47  | 60 | 56      | 52  | 48  | 44  | 53 | 49          | 45  | 41  | 37  | 48 | 43      | 39  | 35  | 31  | 27 |
| 180                                     | 66          | 62  | 58  | 54  | 66 | 62      | 58  | 54  | 50  | 59 | 55          | 51  | 47  | 43  | 54 | 49      | 45  | 41  | 37  | 33 |
| 160                                     | 62          | 57  | 53  | 49  | 62 | 58      | 54  | 50  | 46  | 55 | 51          | 47  | 43  | 39  | 50 | 45      | 41  | 37  | 33  | 29 |
| 140                                     | 58          | 53  | 49  | 45  | 58 | 54      | 50  | 46  | 42  | 51 | 47          | 43  | 39  | 35  | 46 | 41      | 37  | 33  | 29  | 25 |
| 120                                     | 55          | 50  | 46  | 42  | 55 | 51      | 47  | 43  | 39  | 48 | 44          | 40  | 36  | 32  | 43 | 38      | 34  | 30  | 26  | 22 |
| 180                                     | 59          | 54  | 49  | 44  | 59 | 54      | 49  | 44  | 39  | 48 | 43          | 38  | 33  | 28  | 39 | 34      | 29  | 24  | 19  | 14 |
| 160                                     | 56          | 51  | 46  | 41  | 56 | 51      | 46  | 41  | 36  | 45 | 40          | 35  | 30  | 25  | 36 | 31      | 26  | 21  | 16  | 11 |
| 140                                     | 53          | 48  | 43  | 38  | 53 | 48      | 43  | 38  | 33  | 42 | 37          | 32  | 27  | 22  | 33 | 28      | 23  | 18  | 13  | 8  |
| 120                                     | 50          | 45  | 40  | 35  | 50 | 45      | 40  | 35  | 30  | 39 | 34          | 29  | 24  | 19  | 30 | 25      | 20  | 15  | 10  | 5  |
| 180                                     | 53          | 48  | 43  | 38  | 53 | 48      | 43  | 38  | 33  | 42 | 37          | 32  | 27  | 22  | 33 | 28      | 23  | 18  | 13  | 8  |
| 160                                     | 50          | 45  | 40  | 35  | 50 | 45      | 40  | 35  | 30  | 39 | 34          | 29  | 24  | 19  | 30 | 25      | 20  | 15  | 10  | 5  |
| 140                                     | 48          | 43  | 38  | 33  | 48 | 43      | 38  | 33  | 28  | 37 | 32          | 27  | 22  | 17  | 28 | 23      | 18  | 13  | 8   | 3  |
| 120                                     | 45          | 40  | 35  | 30  | 45 | 40      | 35  | 30  | 25  | 34 | 29          | 24  | 19  | 14  | 25 | 20      | 15  | 10  | 5   | 0  |
| 180                                     | 47          | 42  | 37  | 32  | 47 | 42      | 37  | 32  | 27  | 36 | 31          | 26  | 21  | 16  | 27 | 22      | 17  | 12  | 7   | 2  |
| 160                                     | 45          | 40  | 35  | 30  | 45 | 40      | 35  | 30  | 25  | 34 | 29          | 24  | 19  | 14  | 25 | 20      | 15  | 10  | 5   | 0  |
| 140                                     | 43          | 38  | 33  | 28  | 43 | 38      | 33  | 28  | 23  | 32 | 27          | 22  | 17  | 12  | 23 | 18      | 13  | 8   | 3   | 0  |
| 120                                     | 40          | 35  | 30  | 25  | 40 | 35      | 30  | 25  | 20  | 29 | 24          | 19  | 14  | 9   | 20 | 15      | 10  | 5   | 0   | 0  |
| Total cholesterol (mmol/L)              |             |     |     |     | 4  | 5       | 6   | 7   | 8   | 4  | 5           | 6   | 7   | 8   | 4  | 5       | 6   | 7   | 8   | 4  |
| Total cholesterol (mmol/L)              |             |     |     |     | 4  | 5       | 6   | 7   | 8   | 4  | 5           | 6   | 7   | 8   | 4  | 5       | 6   | 7   | 8   | 4  |

**Web Table B Self-assessment questionnaires PAR-Q & YOU**

Physical Activity Readiness  
Questionnaire - PAR-Q  
(revised 2002)

# PAR-Q & YOU

(A Questionnaire for People Aged 15 to 69)

Regular physical activity is fun and healthy, and increasingly more people are starting to become more active every day. Being more active is very safe for most people. However, some people should check with their doctor before they start becoming much more physically active.

If you are planning to become much more physically active than you are now, start by answering the seven questions in the box below. If you are between the ages of 15 and 69, the PAR-Q will tell you if you should check with your doctor before you start. If you are over 69 years of age, and you are not used to being very active, check with your doctor.

Common sense is your best guide when you answer these questions. Please read the questions carefully and answer each one honestly: check YES or NO.

| YES                      | NO                       |                                                                                                                                            |
|--------------------------|--------------------------|--------------------------------------------------------------------------------------------------------------------------------------------|
| <input type="checkbox"/> | <input type="checkbox"/> | 1. Has your doctor ever said that you have a heart condition <u>and</u> that you should only do physical activity recommended by a doctor? |
| <input type="checkbox"/> | <input type="checkbox"/> | 2. Do you feel pain in your chest when you do physical activity?                                                                           |
| <input type="checkbox"/> | <input type="checkbox"/> | 3. In the past month, have you had chest pain when you were not doing physical activity?                                                   |
| <input type="checkbox"/> | <input type="checkbox"/> | 4. Do you lose your balance because of dizziness or do you ever lose consciousness?                                                        |
| <input type="checkbox"/> | <input type="checkbox"/> | 5. Do you have a bone or joint problem (for example, back, knee or hip) that could be made worse by a change in your physical activity?    |
| <input type="checkbox"/> | <input type="checkbox"/> | 6. Is your doctor currently prescribing drugs (for example, water pills) for your blood pressure or heart condition?                       |
| <input type="checkbox"/> | <input type="checkbox"/> | 7. Do you know of <u>any other reason</u> why you should not do physical activity?                                                         |

**If  
you  
answered**

## YES to one or more questions

Talk with your doctor by phone or in person BEFORE you start becoming much more physically active or BEFORE you have a fitness appraisal. Tell your doctor about the PAR-Q and which questions you answered YES.

- You may be able to do any activity you want — as long as you start slowly and build up gradually. Or, you may need to restrict your activities to those which are safe for you. Talk with your doctor about the kinds of activities you wish to participate in and follow his/her advice.
- Find out which community programs are safe and helpful for you.

## NO to all questions

If you answered NO honestly to all PAR-Q questions, you can be reasonably sure that you can:

- start becoming much more physically active — begin slowly and build up gradually. This is the safest and easiest way to go.
- take part in a fitness appraisal — this is an excellent way to determine your basic fitness so that you can plan the best way for you to live actively. It is also highly recommended that you have your blood pressure evaluated. If your reading is over 144/94, talk with your doctor before you start becoming much more physically active.

### DELAY BECOMING MUCH MORE ACTIVE:

- if you are not feeling well because of a temporary illness such as a cold or a fever — wait until you feel better; or
- if you are or may be pregnant — talk to your doctor before you start becoming more active.

**PLEASE NOTE:** If your health changes so that you then answer YES to any of the above questions, tell your fitness or health professional. Ask whether you should change your physical activity plan.

**Informed Use of the PAR-Q:** The Canadian Society for Exercise Physiology, Health Canada, and their agents assume no liability for persons who undertake physical activity, and if in doubt after completing this questionnaire, consult your doctor prior to physical activity.

**No changes permitted. You are encouraged to photocopy the PAR-Q but only if you use the entire form.**

NOTE: If the PAR-Q is being given to a person before he or she participates in a physical activity program or a fitness appraisal, this section may be used for legal or administrative purposes.

"I have read, understood and completed this questionnaire. Any questions I had were answered to my full satisfaction."

NAME \_\_\_\_\_

SIGNATURE \_\_\_\_\_

DATE \_\_\_\_\_

SIGNATURE OF PARENT  
or GUARDIAN (for participants under the age of majority) \_\_\_\_\_

WITNESS \_\_\_\_\_

**Note: This physical activity clearance is valid for a maximum of 12 months from the date it is completed and becomes invalid if your condition changes so that you would answer YES to any of the seven questions.**

**Web Table C** World Health Organization classification of body weight according to body mass index in adults

| Adults (>18 years of age) | BMI (kg/m <sup>2</sup> ) |
|---------------------------|--------------------------|
| Underweight               | <18.5                    |
| Normal                    | 18.5–24.9                |
| Overweight                | 25–29.9                  |
| Obese                     | ≥30                      |
| Class 1                   | 30–34.9                  |
| Class 2                   | 35–39.9                  |
| Class 3                   | ≥40                      |

BMI = body mass index.

**Web Table D** Measures of general obesity and abdominal adiposity

|                                                               |
|---------------------------------------------------------------|
| <b>A. Measures of general obesity</b>                         |
| • Body mass index                                             |
| <b>B. Measures of abdominal adiposity</b>                     |
| • Waist circumference                                         |
| • Waist : hip ratio                                           |
| • Waist : height ratio                                        |
| <b>C. Direct measures of fat mass</b>                         |
| • Bioelectrical impedance analysis                            |
| • Skinfold thicknesses                                        |
| <b>D. Measures of general obesity and abdominal adiposity</b> |
| • Dual-energy X-ray absorptiometry                            |
| • Ultrasound                                                  |
| • Computed tomography                                         |
| • Magnetic resonance imaging                                  |

**Web Table E** Selected drugs that may increase risk of myopathy and rhabdomyolysis when used concomitantly with statin (CYP3A4 inhibitors/substrates or other mechanisms)

| CYP3A4 Inhibitors/substrates                                                                                                        | Others                 |
|-------------------------------------------------------------------------------------------------------------------------------------|------------------------|
| Cyclosporine, tacrolimus, sirolimus                                                                                                 | Digoxin                |
| Macrolides (azithromycin, clarithromycin, erythromycin, telithromycin)                                                              | Fibrates (gemfibrozil) |
| Azole antifungals (fluconazole, itraconazole, ketoconazole, posaconazole)                                                           | Niacin                 |
| Calcium antagonists (mibefradil, diltiazem, verapamil)                                                                              |                        |
| Nefazodone                                                                                                                          |                        |
| HIV protease inhibitors (amprenavir, atazanavir, darunavir, fosamprenavir, indinavir, lopinavir, nelfinavir, ritonavir, saquinavir) |                        |
| Hepatitis C drugs (boceprevir, telaprevir)                                                                                          |                        |
| Danazol                                                                                                                             |                        |
| Amiodarone                                                                                                                          |                        |
| Grapefruit juice                                                                                                                    |                        |
| Sildenafil                                                                                                                          |                        |
| Warfarin                                                                                                                            |                        |

**Web Table F** Reasons for medication non-adherence according to the World Health Organization

| Category of non-adherence | Example                                                                                                                                                                                                                                    |
|---------------------------|--------------------------------------------------------------------------------------------------------------------------------------------------------------------------------------------------------------------------------------------|
| Health system             | Poor quality of provider–patient relationship; poor knowledge on medication and/or low acceptance of guidelines; poor communication (e.g. limited, complex or confusing advice); lack of access to healthcare; lack of continuity of care. |
| Condition                 | Asymptomatic chronic disease (lack of physical cues); co-morbid mental health disorders (e.g. depression).                                                                                                                                 |
| Patient                   | Physical impairments (e.g. vision problems or impaired dexterity); cognitive impairment; psychological/behavioural factors (e.g. lack of motivation, low self-efficacy, impulsivity); younger age.                                         |
| Therapy                   | Complexity of regimen; side-effects.                                                                                                                                                                                                       |
| Socio-economic            | Low literacy; high medication costs; poor social support.                                                                                                                                                                                  |

- (E) Selected drugs that may increase the risk of myopathy and rhabdomyolysis when used concomitantly with statin (CYP3A4 inhibitors/substrates or other mechanisms)
- (F) Reasons for medication non-adherence according to the World Health Organization

## 6. Web References

1. European Heart Rhythm Association, European Association for Cardio-Thoracic Surgery, Camm AJ, Kirchhof P, Lip GY, Schotten U, Savelieva I, Ernst S, Van Gelder IC, Al-Attar N, Hindricks G, Prendergast B, Heidbuchel H, Alfieri O, Angelini A, Atar D, Colonna P, De Caterina R, De Sutter J, Goette A, Gorenek B, Heldal M, Hohloser SH, Kolh P, Le Heuzey JY, Ponikowski P, Rutten FH. Guidelines for the management of atrial fibrillation: the Task Force for the Management of Atrial Fibrillation of the European Society of Cardiology (ESC). *Eur Heart J* 2010;**31**:2369–2429.
2. Camm AJ, Lip GY, De Caterina R, Savelieva I, Atar D, Hohnloser SH, Hindricks G, Kirchhof P, Bax JJ, Baumgartner H, Ceconi C, Dean V, Deaton C, Fagard R, Funck-Brentano C, Hasdai D, Hoes A, Kirchhof P, Knuuti J, Kolh P, McDonagh T, Moulin C, Popescu BA, Reiner Z, Sechtem U, Sirnes PA, Tendera M, Torbicki A, Vahanian A, Windecker S, Vardas P, Al-Attar N, Alfieri O, Angelini A, Blomstrom-Lundqvist C, Colonna P, De Sutter J, Ernst S, Goette A, Gorenek B, Hatala R, Heidbuchel H, Heldal M, Kristensen SD, Kolh P, Le Heuzey J-Y, Mavarakis H, Mont L, Filardi PP, Ponikowski P, Prendergast B, Rutten FH, Schotten U, Van Gelder IC, Verheugt FWA. 2012 focused update of the ESC Guidelines for the management of atrial fibrillation: an update of the 2010 ESC Guidelines for the management of atrial fibrillation. Developed with the special contribution of the European Heart Rhythm Association. *Eur Heart J* 2012;**33**: 2719–2747.
3. Stewart S, Hart CL, Hole DJ, McMurray JJ. Population prevalence, incidence, and predictors of atrial fibrillation in the Renfrew/Paisley study. *Heart* 2001;**86**: 516–521.
4. Nyrnes A, Mathiesen EB, Njolstad I, Wilsgaard T, Lochen ML. Palpitations are predictive of future atrial fibrillation. An 11-year follow-up of 22,815 men and women: the Tromsø Study. *Eur J Prev Cardiol* 2013;**20**:729–736.
5. Manolis AJ, Rosei EA, Coca A, Cifkova R, Erdine SE, Kjeldsen S, Lip GY, Narkiewicz K, Parati G, Redon J, Schmieder R, Tsioufis C, Mancia G. Hypertension and atrial fibrillation: diagnostic approach, prevention and treatment. Position paper of the Working Group 'Hypertension Arrhythmias and Thrombosis' of the European Society of Hypertension. *J Hypertens* 2012;**30**:239–252.
6. Lowres N, Neubeck L, Freedman SB, Briffa T, Bauman A, Redfern J. Lifestyle risk reduction interventions in atrial fibrillation: a systematic review. *Eur J Prev Cardiol* 2012;**19**:1091–1100.
7. Task Force on the management of ST-segment elevation acute myocardial infarction of the European Society of Cardiology (ESC), Steg PG, James SK, Atar D, Badano LP, Blomstrom-Lundqvist C, Borger MA, Di Mario C, Dickstein K, Ducrocq G, Fernandez-Aviles F, Gershlick AH, Giannuzzi P, Halvorsen S, Huber K, Juni P, Kastrati A, Knuuti J, Lenzen MJ, Mahaffey KW, Valgimigli M, van 't Hof A, Widimsky P, Zahger D. ESC Guidelines for the management of acute myocardial infarction in patients presenting with ST-segment elevation. *Eur Heart J* 2012;**33**:2569–2619.
8. Hamm CW, Bassand JP, Agewall S, Bax J, Boersma E, Bueno H, Caso P, Dudek D, Gielen S, Huber K, Ohman M, Petrie MC, Sonntag F, Uva MS, Storey RF, Wijns W, Zahger D, Bax JJ, Auricchio A, Baumgartner H, Ceconi C, Dean V, Deaton C, Fagard R, Funck-Brentano C, Hasdai D, Hoes A, Knuuti J, Kolh P, McDonagh T, Moulin C, Poldermans D, Popescu BA, Reiner Z, Sechtem U, Sirnes PA, Torbicki A, Vahanian A, Windecker S, Windecker S, Achenbach A, Badimon L, Bertrand M, Bøtker HE, Collet J-P, Crea F, Danchin N, Falk E, Goudevens J, Gulba D, Hambrecht R, Herrmann J, Kastrati A, Kjeldsen K, Kristensen SD, Lancellotti P, Mehilli J, Merkely B, Montalescot G, Neumann F-J, Neyses L, Perk J, Roffi M, Romeo F, Ruda M, Swahn E, Valgimigli M, Vrints CJM, Widimsky P. ESC Guidelines for the management of acute coronary syndromes in patients presenting without persistent ST-segment elevation: The Task Force for the management of acute coronary syndromes (ACS) in patients presenting without persistent ST-segment elevation of the European Society of Cardiology (ESC). *Eur Heart J* 2011;**32**:2999–3054.
9. Piepoli MF, Corra U, Adamopoulos S, Benzer W, Bjarnason-Wehrens B, Cupples M, Dendale P, Doherty P, Gaita D, Höfer S, McGee H, Mendes M, Niebauer J, Pogosova N, Garcia-Porrero E, Rauch B, Schmid JP, Giannuzzi P. Secondary prevention in the clinical management of patients with cardiovascular diseases. Core components, standards and outcome measures for referral and delivery: a policy statement from the cardiac rehabilitation section of the European Association for Cardiovascular Prevention & Rehabilitation. Endorsed by the Committee for Practice Guidelines of the European Society of Cardiology. *Eur J Prev Cardiol* 2014;**21**:664–681.
10. Task Force Members, Montalescot G, Sechtem U, Achenbach S, Andreotti F, Arden C, Budaj A, Bugiardini R, Crea F, Cuisset T, Di Mario C, Ferreira JR, Gersh BJ, Gitt AK, Hulot J-S, Marx N, Opie LH, Pfisterer M, Prescott E, Ruschitzka F, Sabaté M, Senior R, Taggart DP, van der Wall EE, Vrints CJM, Zamorano JL, Achenbach S, Baumgartner H, Bax JJ, Bueno H, Dean V, Deaton C, Erol C, Fagard R, Ferrari R, Hasdai D, Hoes AWW, Kirchhof P, Knuuti J, Kolh P, Lancellotti P, Linhart A, Nihoyannopoulos P, Piepoli MF, Ponikowski P, Sirnes PA, Tamargo JL, Tendera M, Torbicki A, Wijns W, Windecker S, Knuuti J, Valgimigli M, Bueno H, Claeys MJ, Donner-Banzhoff N, Erol C, Frank H, Funck-Brentano C, Gaemperli O, Gonzalez-Juanatey JR, Hamilos M, Hasdai D, Husted S, James SK, Kervinen K, Kolh P, Kristensen SD, Lancellotti P, Maggioni AP, Piepoli MF, Pries AR, Romeo F, Rydén L, Simoons ML, Steg PG, Timmis A, Wijns W, Windecker S, Yildirim A, Zamorano JL. 2013 ESC guidelines on the management of stable coronary artery disease: the Task Force on the management of stable coronary artery disease of the European Society of Cardiology. *Eur Heart J* 2013;**34**:2949–3003.
11. McMurray JJ, Adamopoulos S, Anker SD, Auricchio A, Bohm M, Dickstein K, Falk V, Filippatos G, Fonseca C, Gomez-Sanchez MA, Jaarsma T, Køber L, Lip GY, Maggioni AP, Parkhomenko A, Pieske BM, Popescu BA, Rønnevik PK, Rutten FH, Schwitzer J, Seferovic P, Stepinska J, Trindade PT, Voors AA, Zannad F, Zeheer A. ESC Guidelines for the diagnosis and treatment of acute and chronic heart failure 2012: The Task Force for the Diagnosis and Treatment of Acute and Chronic Heart Failure 2012 of the European Society of Cardiology. Developed in collaboration with the Heart Failure Association (HFA) of the ESC. *Eur Heart J* 2012;**33**: 1787–1847.
12. January CT, Wann LS, Alpert JS, Calkins H, Cigarroa JE, Cleveland JC Jr, Conti JB, Ellnor PT, Ezekowitz MD, Field ME, Murray KT, Sacco RL, Stevenson WG, Tchou PJ, Tracy CM, Yancy CW. 2014 AHA/ACC/HRS guideline for the management of patients with atrial fibrillation: a report of the American College of Cardiology/American Heart Association Task Force on Practice Guidelines and the Heart Rhythm Society. *J Am Coll Cardiol* 2014;**64**:e1–e76.
13. Zipes DP, Camm AJ, Borggrefe M, Buxton AE, Chaitman B, Fromer M, Gregoratos G, Klein G, Moss AJ, Myerburg RJ, Priori SG, Quinones MA, Roden DM, Silka MJ, Tracy C, Smith SC Jr, Jacobs AK, Adams CD, Antman EM, Anderson JL, Hunt SA, Halperin JL, Nishimura R, Ornato JP, Page RL, Riegel B, Priori SG, Blanc JJ, Budaj A, Camm AJ, Dean V, Deckers JW, Despres C, Dickstein K, Lekakis J, McGregor K, Metra M, Morais J, Osterspey A, Tamargo JL, Zamorano JL. ACC/AHA/ESC 2006 Guidelines for Management of Patients With Ventricular Arrhythmias and the Prevention of Sudden Cardiac Death: a report of the American College of Cardiology/American Heart Association Task Force and the European Society of Cardiology Committee for Practice Guidelines (writing committee to develop Guidelines for Management of Patients With Ventricular Arrhythmias and the Prevention of Sudden Cardiac Death): developed in collaboration with the European Heart Rhythm Association and the Heart Rhythm Society. *Circulation* 2006;**114**:e385–e484.
14. Kolh P, Windecker S, Alfonso F, Collet JP, Cremer J, Falk V, Filippatos G, Hamm C, Head SJ, Juni P, Kappetein AP, Kastrati A, Knuuti J, Landmesser U, Laufer G, Neumann J, Richter DJ, Schauerte P, Sousa Uva M, Stefanini GG, Taggart DP, Torracca L, Valgimigli M, Wijns W, Witkowski A. 2014 ESC/EACTS Guidelines on myocardial revascularization: The Task Force on Myocardial Revascularization of the European Society of Cardiology (ESC) and the European Association for Cardio-Thoracic Surgery (EACTS) Developed with the special contribution of the European Association of Percutaneous Cardiovascular Interventions (EAPCI). *Eur Heart J* 2014;**35**:2541–2619.
15. Eckel RH, Jakicic JM, Ard JD, de Jesus JM, Houston Miller N, Hubbard VS, Lee IM, Lichtenstein AH, Loria CM, Millen BE, Nonas CA, Sacks FM, Smith SC Jr, Svetkey LP, Wadden TA, Yanovski SZ. 2013 AHA/ACC guideline on lifestyle management to reduce cardiovascular risk: a report of the American College of Cardiology/American Heart Association Task Force on Practice Guidelines. *Circulation* 2014;**129**(25 Suppl 2):S76–S99.
16. Pogosova N, Saner H, Pedersen SS, Cupples ME, McGee H, Hofer S, Doyle F, Schmid JP, von Känel R. Psychosocial aspects in cardiac rehabilitation: from theory to practice. A position paper from the Cardiac Rehabilitation Section of the European Association of Cardiovascular Prevention and Rehabilitation of the European Society of Cardiology. *Eur J Prev Cardiol* 2015;**22**:1290–1306.
17. European Association of Cardiovascular Prevention and Rehabilitation Committee for Science Guidelines, Corra U, Piepoli MF, Carre F, Heuschmann P, Hoffmann U, Verschuren M, Halcox J, Giannuzzi P, Saner H, Wood D, Piepoli MF, Corra U, Benzer W, Bjarnason-Wehrens B, Dendale P, Gaita D, McGee H, Mendes M, Niebauer J, Zwissler AD, Schmid JP. Secondary prevention through cardiac rehabilitation: physical activity counselling and exercise training: key components of the position paper from the Cardiac Rehabilitation Section of the European



- Association of Cardiovascular Prevention and Rehabilitation. *Eur Heart J* 2010;**31**: 1967–1974.
18. Hambrecht R, Niebauer J, Marburger C, Grunze M, Kalberer B, Hauer K, Schlierf G, Kübler W, Schuler G. Various intensities of leisure time physical activity in patients with coronary artery disease: effects on cardiorespiratory fitness and progression of coronary atherosclerotic lesions. *J Am Coll Cardiol* 1993;**22**:468–477.
  19. Schairer JR, Keteyian SJ, Ehrman JK, Brawner CA, Berkebile ND. Leisure time physical activity of patients in maintenance cardiac rehabilitation. *J Cardiopulm Rehab* 2003;**23**:260–265.
  20. Perk J, De Backer G, Gohlke H, Graham I, Reiner Z, Verschuren M, Albus C, Benlian P, Boysen G, Cifkova R, Deaton C, Ebrahim S, Fisher M, Germano G, Hobbs R, Hoes A, Karadeniz S, Mezzani A, Prescott E, Ryden L, Scherer M, Syväne M, Scholte Op, Reimer WJ, Vrints C, Wood D, Zamorano JL, Zannad F. European Guidelines on cardiovascular disease prevention in clinical practice (version 2012). The Fifth Joint Task Force of the European Society of Cardiology and Other Societies on Cardiovascular Disease Prevention in Clinical Practice (constituted by representatives of nine societies and by invited experts). *Eur Heart J* 2012; **33**:1635–1701.
  21. Stone NJ, Robinson JG, Lichtenstein AH, Bairey Merz CN, Blum CB, Eckel RH, Goldberg AC, Gordon D, Levy D, Lloyd-Jones DM, McBride P, Schwartz JS, Shero ST, Smith SC Jr, Watson K, Wilson PW, Eddleman KM, Jarrett NM, LaBresh K, Nevo L, Wnek J, Anderson JL, Halperin JL, Albert NM, Bozkurt B, Brindis RG, Curtis LH, DeMets D, Hochman JS, Kovacs RJ, Ohman EM, Pressler SJ, Sellke FW, Shen WK, Smith SC Jr, Tomaselli GF. 2013 ACC/AHA guideline on the treatment of blood cholesterol to reduce atherosclerotic cardiovascular risk in adults: a report of the American College of Cardiology/American Heart Association Task Force on Practice Guidelines. *Circulation* 2014;**129**(25 Suppl 2): S1–S45.
  22. Jensen MD, Ryan DH, Apovian CM, Ard JD, Comuzzie AG, Donato KA, Hu FB, Hubbard VS, Jakicic JM, Kushner RF, Loria CM, Millen BE, Nonas CA, Pi-Sunyer FX, Stevens J, Stevens VJ, Wadden TA, Wolfe BM, Yanovski SZ. 2013 AHA/ACC/TOS guideline for the management of overweight and obesity in adults: a report of the American College of Cardiology/American Heart Association Task Force on Practice Guidelines and The Obesity Society. *Circulation* 2014;**129**(25 Suppl 2):S102–S138.
  23. Task Force on diabetes, pre-diabetes, and cardiovascular diseases of the European Society of Cardiology (ESC); European Association for the Study of Diabetes (EASD). Ryden L, Grant PJ, Anker SD, Berne C, Cosentino F, Danchin N, Deaton C, Escaned J, Hammes HP, Huikuri H, Marre M, Marx N, Mellbin L, Ostergren J, Patrono C, Seferovic P, Uva MS, Taskinen MR, Tendera M, Tuomilehto J, Valensi P, Zamorano JL. ESC Guidelines on diabetes, pre-diabetes, and cardiovascular diseases developed in collaboration with the EASD: the Task Force on diabetes, pre-diabetes, and cardiovascular diseases of the European Society of Cardiology (ESC) and developed in collaboration with the European Association for the Study of Diabetes (EASD). *Eur Heart J* 2013;**34**:3035–3087.
  24. Go AS, Bauman MA, Coleman King SM, Fonarow GC, Lawrence W, Williams KA, Sanchez E. An effective approach to high blood pressure control: a science advisory from the American Heart Association, the American College of Cardiology, and the Centers for Disease Control and Prevention. *Hypertension* 2014;**63**:878–885.
  25. Brignole M, Auricchio A, Baron-Esquivas G, Bordachar P, Boriani G, Breithardt OA, Cleland J, Dehro JC, Delgado V, Elliott PM, Gorenek B, Israel CW, Leclercq C, Linde C, Mont L, Padeletti L, Sutton R, Vardas PE. 2013 ESC Guidelines on cardiac pacing and cardiac resynchronization therapy: the Task Force on cardiac pacing and resynchronization therapy of the European Society of Cardiology (ESC). *Developed in collaboration with the European Heart Rhythm Association (EHRA)*. *Eur Heart J* 2013;**34**:2281–2329.
  26. Chow CK, Jolly S, Rao-Melacini P, Fox KA, Anand SS, Yusuf S. Association of diet, exercise, and smoking modification with risk of early cardiovascular events after acute coronary syndromes. *Circulation* 2010;**121**:750–758.
  27. Kotseva K, Wood D, De Backer G, De Bacquer D, Pyorala K, Keil U. EUROASPIRE III: a survey on the lifestyle, risk factors and use of cardioprotective drug therapies in coronary patients from 22 European countries. *Eur J Cardiovasc Prev Rehabil* 2009; **16**:121–137.
  28. Bjarnason-Wehrens B, McGee H, Zwisler AD, Piepoli MF, Benzer W, Schmid JP, Dendale P, Pogossova NG, Zdrenghea D, Niebauer J, Mendes M; Cardiac Rehabilitation Section European Association of Cardiovascular Prevention and Rehabilitation. Cardiac rehabilitation in Europe: results from the European Cardiac Rehabilitation Inventory Survey. *Eur J Cardiovasc Prev Rehabil* 2010;**17**:410–418.
  29. Kotseva K, Wood D, De Backer G, De Bacquer D. Use and effects of cardiac rehabilitation in patients with coronary heart disease: results from the EUROASPIRE III survey. *Eur J Prev Cardiol* 2013;**20**:817–826.
  30. Piepoli MF, Corra U, Abreu A, Cupples M, Davos C, Doherty P, Höfer S, Garcia-Porrero E, Rauch B, Vigorito C, Völker H, Schmid JP. Challenges in secondary prevention of cardiovascular diseases: a review of the current practice. *Int J Cardiol* 2015;**180**:114–119.
  31. Piepoli MF, Corra U, Benzer W, Bjarnason-Wehrens B, Dendale P, Gaita D, McGee H, Mendes M, Niebauer J, Zwisler AD, Schmid JP. Secondary prevention through cardiac rehabilitation: from knowledge to implementation. A position paper from the Cardiac Rehabilitation Section of the European Association of Cardiovascular Prevention and Rehabilitation. *Eur J Cardiovasc Prev Rehabil* 2010;**17**: 1–17.
  32. Yancy CW, Jessup M, Bozkurt B, Butler J, Casey DE Jr, Drazner MH, Fonarow GC, Geraci SA, Horwich T, Januzzi JL, Johnson MR, Kasper EK, Levy WC, Masoudi FA, McBride PE, McMurray JJ, Mitchell JE, Peterson PN, Riegel B, Sam F, Stevenson LW, Tang WH, Tsai EJ, Wilkoff BL. 2013 ACCF/AHA guideline for the management of heart failure: a report of the American College of Cardiology Foundation/American Heart Association Task Force on practice guidelines. *Circulation* 2013;**128**: e240–e327.
  33. Maisel AS, Krishnaswamy P, Nowak RM, McCord J, Hollander JE, Duc P, Omland T, Storrow AB, Abraham WT, Wu AH, Clopton P, Steg PG, Westheim A, Knudsen CW, Perez A, Kazanegra R, Herrmann HC, McCullough PA. Rapid measurement of B-type natriuretic peptide in the emergency diagnosis of heart failure. *N Engl J Med* 2002;**347**:161–167.
  34. Corra U, Piepoli MF, Adamopoulos S, Agostoni P, Coats AJ, Conraads V, Lambrinou E, Pieske B, Piotrowicz E, Schmid J-P, Seferović PM, Anker SD, Filippatos G, Ponikowski PP. Cardiopulmonary exercise testing in systolic heart failure in 2014: the evolving prognostic role: a position paper from the committee on exercise physiology and training of the heart failure association of the ESC. *Eur J Heart Fail* 2014;**16**:929–941.
  35. Piepoli MF, Davos C, Francis DP, Coats AJ. Exercise training meta-analysis of trials in patients with chronic heart failure (ExTraMATCH). *BMJ* 2004;**328**:189.
  36. O'Connor CM, Whellan DJ, Lee KL, Keteyian SJ, Cooper LS, Ellis SJ, Leifer ES, Kraus WE, Kitzman DW, Blumenthal JA, Rendall DS, Miller NH, Fleg JL, Schulman KA, McKelvie RS, Zannad F, Piña IL. Efficacy and safety of exercise training in patients with chronic heart failure: HF-ACTION randomized controlled trial. *JAMA* 2009;**301**:1439–1450.
  37. Wisloff U, Stoylen A, Loennechen JP, Bruvold M, Rognum O, Haram PM, Tjønnå AE, Helgerud J, Slørdahl SA, Lee SJ, Videm V, Bye A, Smith GL, Najjar SM, Ellingsen Ø, Skjaerpe T. Superior cardiovascular effect of aerobic interval training versus moderate continuous training in heart failure patients: a randomized study. *Circulation* 2007;**115**:3086–3094.
  38. Piepoli MF, Conraads V, Corra U, Dickstein K, Francis DP, Jaarsma T, McMurray J, Pieske B, Piotrowicz E, Schmid JP, Anker SD, Solal AC, Filippatos GS, Hoes AVW, Gielen S, Giannuzzi P, Ponikowski PP. Exercise training in heart failure: from theory to practice. A consensus document of the Heart Failure Association and the European Association for Cardiovascular Prevention and Rehabilitation. *Eur J Heart Fail* 2011;**13**:347–357.
  39. Jencks SF, Williams MV, Coleman EA. Rehospitalizations among patients in the Medicare fee-for-service program. *N Engl J Med* 2009;**360**:1418–1428.
  40. Kociol RD, McNulty SE, Hernandez AF, Lee KL, Redfield MM, Tracy RP, Braunwald E, O'Connor CM, Felker GM. Markers of decongestion, dyspnea relief, and clinical outcomes among patients hospitalized with acute heart failure. *Circ Heart Fail* 2013;**6**:240–245.
  41. Viswanathan M, Golin CE, Jones CD, Ashok M, Blalock SJ, Wines RC, Coker-Schwimmer EJ, Rosen DL, Sista P, Lohr KN. Interventions to improve adherence to self-administered medications for chronic diseases in the United States: a systematic review. *Ann Intern Med* 2012;**157**:785–795.
  42. Piepoli MF, Guazzi M, Boriani G, Ciccoira M, Corra U, DallaLibera L, Emdin M, Mele D, Passino C, Vescovo G, Vigorito C, Villani GQ, Agostoni P. Exercise intolerance in chronic heart failure: mechanisms and therapies. Part I. *Eur J Cardiovasc Prev Rehabil* 2010;**17**:637–642.
  43. Piepoli MF, Guazzi M, Boriani G, Ciccoira M, Corra U, DallaLibera L, Emdin M, Mele D, Passino C, Vescovo G, Vigorito C, Villani G, Agostoni P. Exercise intolerance in chronic heart failure: mechanisms and therapies. Part II. *Eur J Cardiovasc Prev Rehabil* 2010;**17**:643–648.
  44. Conraads VM, Deaton C, Piotrowicz E, Santaularia N, Tierney S, Piepoli MF, Pieske B, Schmid JP, Dickstein K, Ponikowski PP, Jaarsma T. Adherence of heart failure patients to exercise: barriers and possible solutions: a position statement of the Study Group on Exercise Training in Heart Failure of the Heart Failure Association of the European Society of Cardiology. *Eur J Heart Fail* 2012;**14**:451–458.
  45. Mezzani A, Hamm LF, Jones AM, McBride PE, Moholdt T, Stone JA, Urhausen A, Williams MA. Aerobic exercise intensity assessment and prescription in cardiac rehabilitation: a joint position statement of the European Association for Cardiovascular Prevention and Rehabilitation, the American Association of Cardiovascular and Pulmonary Rehabilitation and the Canadian Association of Cardiac Rehabilitation. *Eur J Prev Cardiol* 2013;**20**:442–467.
  46. Haykowsky MJ, Timmons MP, Kruger C, McNeely M, Taylor DA, Clark AM. Meta-analysis of aerobic interval training on exercise capacity and systolic function in patients with heart failure and reduced ejection fractions. *Am J Cardiol* 2013;**111**: 1466–1469.

47. Udelson JE. Heart failure with preserved ejection fraction. *Circulation* 2011;**124**: e540–e543.
48. Senni M, Paulus WJ, Gavazzi A, Fraser AG, Diez J, Solomon SD, Smiseth OA, Guazzi M, Lam CS, Maggioni AP, Tschöpe C, Metra M, Hummel SL, Edelmann F, Ambrosio G, Stewart Coats AJ, Filippatos GS, Gheorghiade M, Anker SD, Levy D, Pfeffer MA, Stough WG, Pieske BM. New strategies for heart failure with preserved ejection fraction: the importance of targeted therapies for heart failure phenotypes. *Eur Heart J* 2014;**35**:2797–2815.
49. Taylor RS, Sagar VA, Davies EJ, Briscoe S, Coats AJ, Dalal H, Lough F, Rees K, Singh S. Exercise-based rehabilitation for heart failure. *Cochrane Database Syst Rev* 2014;**4**:CD003331.
50. Kernan WN, Ovbiagele B, Black HR, Bravata DM, Chimowitz MI, Ezekowitz MD, Fang MC, Fisher M, Furie KL, Heck DV, Johnston SC, Kasner SE, Kittner SJ, Mitchell PH, Rich MW, Richardson D, Schwamm LH, Wilson JA. Guidelines for the prevention of stroke in patients with stroke and transient ischemic attack: a guideline for healthcare professionals from the American Heart Association/American Stroke Association. *Stroke* 2014;**45**:2160–2236.
51. Steiner T, Al-Shahi Salman R, Beer R, Christensen H, Cordonnier C, Csiba L, Forsting M, Harnof S, Klijn CJM, Krieger D, Mendelow AD, Molina C, Montaner J, Overgaard K, Petersson J, Roine RO, Schmutzhard E, Schwerdtfeger K, Stapf C, Tatlisumak T, Thomas BM, Toni D, Unterberg A, Wagner M. European Stroke Organisation (ESO) guidelines for the management of spontaneous intracerebral hemorrhage. *Int J Stroke* 2014;**9**:840–855.
52. Steiner T, Juvela S, Unterberg A, Jung C, Forsting M, Rinkel G. European Stroke Organization guidelines for the management of intracranial aneurysms and subarachnoid haemorrhage. *Cerebrovasc Dis* 2013;**35**:93–112.
53. Saposnik G, Barinagarrementeria F, Brown RD Jr, Bushnell CD, Cucchiara B, Cushman M, deVeber G, Ferro JM, Tsai FY. Diagnosis and management of cerebral venous thrombosis: a statement for healthcare professionals from the American Heart Association/American Stroke Association. *Stroke* 2011;**42**:1158–1192.
54. Collins R, Armitage J, Parish S, Sleight P, Peto R. Heart Protection Study Collaborative Group. Effects of cholesterol-lowering with simvastatin on stroke and other major vascular events in 20536 people with cerebrovascular disease or other high-risk conditions. *Lancet* 2004;**363**:757–767.
55. Amarenco P, Bogousslavsky J, Callahan A 3rd, Goldstein LB, Hennerici M, Rudolph AE, Silesen H, Simunovic L, Szarek M, Welch KM, Zivin JA. High-dose atorvastatin after stroke or transient ischemic attack. *N Engl J Med* 2006;**355**: 549–559.
56. Hackam DG, Woodward M, Newby LK, Bhatt DL, Shao M, Smith EE, Donner A, Mamdani M, Douketis JD, Arima H, Chalmers J, MacMahon S, Tirschwell DL, Psaty BM, Bushnell CD, Aguilar MI, Capampangan DJ, Werring DJ, De Rango P, Viswanathan A, Danchin N, Cheng CL, Yang YH, Verdel BM, Lai MS, Kennedy J, Uchiyama S, Yamaguchi T, Ikeda Y, Mrkobrada M. Statins and intracerebral hemorrhage: collaborative systematic review and meta-analysis. *Circulation* 2011;**124**: 2233–2242.
57. Bath PM, Houlton A, Woodhouse L, Sprigg N, Wardlaw J, Pocock S. Statistical analysis plan for the 'Efficacy of Nitric Oxide in Stroke' (ENOS) trial. *Int J Stroke* 2014;**9**: 372–374.
58. Bath PM, Woodhouse L, Scutt P, Krishnan K, Wardlaw JM, Bereczki D, Sprigg N, Berge E, Beridze M, Caso V, Chen C, Christensen H, Collins R, El Etribi A, Laska AC, Lees KR, Ozturk S, Phillips S, Pocock S, Asita de Silva H, Szatmari S, Utton S. Efficacy of nitric oxide, with or without continuing antihypertensive treatment, for management of high blood pressure in acute stroke (ENOS): a partial-factorial randomised controlled trial. *Lancet* 2015;**385**:617–628.
59. Anderson CS, Heeley E, Huang Y, Wang J, Stapf C, Delcourt C, Lindley R, Robinson T, Lavados P, Neal B, Hata J, Arima H, Parsons M, Li Y, Wang J, Heritier S, Li Q, Woodward M, Simes RJ, Davis SM, Chalmers J. Rapid blood-pressure lowering in patients with acute intracerebral hemorrhage. *N Engl J Med* 2013;**368**:2355–2365.
60. Law MR, Morris JK, Wald NJ. Use of blood pressure lowering drugs in the prevention of cardiovascular disease: meta-analysis of 147 randomised trials in the context of expectations from prospective epidemiological studies. *BMJ* 2009;**338**:b1665.
61. PROGRESS Collaborative Group. Randomised trial of a perindopril-based blood-pressure-lowering regimen among 6,105 individuals with previous stroke or transient ischaemic attack. *Lancet* 2001;**358**:1033–1041.
62. Arima H, Chalmers J, Woodward M, Anderson C, Rodgers A, Davis S, MacMahon S, Neal B. Lower target blood pressures are safe and effective for the prevention of recurrent stroke: the PROGRESS trial. *J Hypertens* 2006;**24**: 1201–1208.
63. Arima H, Anderson C, Omai T, Woodward M, MacMahon S, Mancia G, Boussier MG, Tzourio C, Harrap S, Liu L, Neal B, Chalmers J. Degree of blood pressure reduction and recurrent stroke: the PROGRESS trial. *J Neurol Neurosurg Psychiatry* 2014;**85**:1284–1285.
64. ESPRIT Study Group, Halkes PH, van Gijn J, Kappelle LJ, Koudstaal PJ, Algra A. Aspirin plus dipyridamole versus aspirin alone after cerebral ischaemia of arterial origin (ESPRIT): randomised controlled trial. *Lancet* 2006;**367**:1665–1673.
65. Sacco RL, Diener HC, Yusuf S, Cotton D, Ounpuu S, Lawton WA, Palesch Y, Martin RH, Albers GW, Bath P, Bornstein N, Chan BPL, Chen S-T, Cunha L, Dahlöf B, De Keyser J, Donnan GA, Estol C, Gorelick P, Gu V, Hermansson K, Hilbrich L, Kaste M, Lu C, Machnig T, Pais P, Roberts R, Skvortsova V, Teal P, Toni D, VanderMaelen C, Voigt T, Weber M, Yoon B-W. Aspirin and extended-release dipyridamole versus clopidogrel for recurrent stroke. *N Engl J Med* 2008;**359**:1238–1251.
66. Yusuf S, Sleight P, Pogue J, Bosch J, Davies R, Dagenais G. Effects of an angiotensin-converting-enzyme inhibitor, ramipril, on cardiovascular events in high-risk patients. *The Heart Outcomes Prevention Evaluation Study Investigators. N Engl J Med* 2002;**347**:145–153.
67. ONTARGET Investigators. Telmisartan, ramipril, or both in patients at high risk for vascular events. *N Engl J Med* 2008;**358**:1547–1559.
68. Lane DA, Lip GY. Treatment of hypertension in peripheral arterial disease. *Cochrane Database Syst Rev* 2013;**12**:CD003075.
69. Antithrombotic Trialists' Collaborative. Aspirin in the primary and secondary prevention of vascular disease: collaborative meta-analysis of individual participant data from randomised trials. *Lancet* 2009;**373**:1849–1860.
70. Tendera M, Aboyans V, Bartelink ML, Baumgartner I, Clement D, Collet J-P, Cremonesi A, De Carlo M, Erbel R, Fowkes FGR, Heras M, Kownator S, Minar E, Ostergren J, Poldermans D, Rimbaut V, Roffi M, Röther J, Sievert H, van Sambeek M, Zeller T, Bax J, Auricchio A, Baumgartner H, Ceconi C, Dean V, Deaton C, Fagard R, Funck-Brentano C, Hasdai D, Hoes A, Knuuti J, Kolh P, McDonagh T, Moulin C, Poldermans D, Popescu D, Reiner Z, Sechtem U, Simes PA, Torbicki A, Vahanian A, Windecker S, Kolh P, Torbicki A, Agewall S, Blinc A, Bulvas M, Cosentino F, De Backer T, Gottsäter A, Gulba D, Guzik TJ, Jönsson B, Késmárky G, Kitsiou A, Kuczmik W, Larsen ML, Madaric J, Mas J-L, McMurray JJV, Micari A, Mosseri M, Müller C, Naylor R, Norrving B, Oto O, Pasierski T, Plouin P-F, Ribichini F, Ricco J-B, Ruilope L, Schmid J-P, Schwehr U, Sol BGM, Sprynger M, Tiefenbacher C, Tsioufis C, Van Damme H. ESC Guidelines on the diagnosis and treatment of peripheral artery diseases: Document covering atherosclerotic disease of extracranial carotid and vertebral, mesenteric, renal, upper and lower extremity arteries: the Task Force on the Diagnosis and Treatment of Peripheral Artery Diseases of the European Society of Cardiology (ESC). *Eur Heart J* 2011;**32**:2851–2906.
71. Lane R, Ellis B, Watson L, Leng GC. Exercise for intermittent claudication. *Cochrane Database Syst Rev* 2014;**7**:CD000990.
72. Fowkes FG, Housley E, Riemersma RA, Macintyre CC, Cawood EH, Prescott RJ, Ruckley CV. Smoking, lipids, glucose intolerance, and blood pressure as risk factors for peripheral atherosclerosis compared with ischemic heart disease in the Edinburgh Artery Study. *Am J Epidemiol* 1992;**135**:331–340.
73. Radack K, Deck C. Beta-adrenergic blocker therapy does not worsen intermittent claudication in subjects with peripheral arterial disease. A meta-analysis of randomized controlled trials. *Arch Intern Med* 1991;**151**:1769–1776.
74. Lijmer JG, Hunink MG, van den Dungen JJ, Loonstra J, Smit AJ. ROC analysis of non-invasive tests for peripheral arterial disease. *Ultrasound Med Biol* 1996;**22**:391–398.
75. Stoffers HE, Kester AD, Kaiser V, Rinkens PE, Kitslaar PJ, Knottnerus JA. The diagnostic value of the measurement of the ankle-brachial systolic pressure index in primary health care. *J Clin Epidemiol* 1996;**49**:1401–1405.
76. Diehm C, Allenberg JR, Pittrow D, Mahn M, Tepohl G, Haberl RL, Darius H, Burghaus I, Trampisch HJ. Mortality and vascular morbidity in older adults with asymptomatic versus symptomatic peripheral artery disease. *Circulation* 2009;**120**:2053–2061.
77. CAPRIE Steering Committee. A randomised, blinded, trial of clopidogrel versus aspirin in patients at risk of ischaemic events (CAPRIE). *CAPRIE Steering Committee. Lancet* 1996;**348**:1329–1339.
